# Supplementary material for: Exploring the solid state and solution structural chemistry of the utility amide potassium hexamethyldisilazide (KHMDS)
Source: Royal Society of Chemistry journal article supplement (doi:10.1039/c7dt01118k), 2017-01-01
Supplement: c7dt01118k1.pdf [file c7dt01118k1.pdf]

## Supporting Information

### **Exploring the Solid State and Solution Structural Chemistry of the Utility Amide Potassium Hexamethyldisilazide (KHMDs)**

Ana I. Ojeda-Amador, Antonio J. Martínez-Martínez,\* Gemma M. Robertson, Stuart  
D. Robertson, Alan R. Kennedy and Charles T. O'Hara\*

*WestCHEM, Department of Pure and Applied Chemistry, University of Strathclyde, 295  
Cathedral Street, Glasgow, G1 1XL (UK).*

*E-mail: a.j.martinez@strath.ac.uk, charlie.ohara@strath.ac.uk*

# Table of Contents

|                                                                                                                                              |           |
|----------------------------------------------------------------------------------------------------------------------------------------------|-----------|
| <b>CRYSTALLOGRAPHIC AND REFINEMENT DATA</b> .....                                                                                            | <b>4</b>  |
| Table S1. Selected crystallographic and refinement data for 1-5. ....                                                                        | 5         |
| Table S2. Selected crystallographic and refinement data for 6-11. ....                                                                       | 6         |
| <b>NMR SPECTRA</b> .....                                                                                                                     | <b>7</b>  |
| Figure S1. <sup>1</sup> H NMR (400.1 MHz, C <sub>6</sub> D <sub>6</sub> , 300 K) of isolated crystals of 1. ....                             | 7         |
| Figure S2. <sup>13</sup> C{ <sup>1</sup> H} NMR spectrum (100.6 MHz, C <sub>6</sub> D <sub>6</sub> , 300 K) of isolated crystals of 1. ....  | 7         |
| Figure S3. <sup>1</sup> H NMR (400.1 MHz, C <sub>6</sub> D <sub>6</sub> , 300 K) of isolated crystals of 2. ....                             | 8         |
| Figure S4. <sup>13</sup> C{ <sup>1</sup> H} NMR spectrum (100.6 MHz, C <sub>6</sub> D <sub>6</sub> , 300 K) of isolated crystals of 2. ....  | 8         |
| Figure S5. <sup>1</sup> H NMR (400.1 MHz, C <sub>6</sub> D <sub>6</sub> , 300 K) of isolated crystals of 3. ....                             | 9         |
| Figure S6. <sup>13</sup> C{ <sup>1</sup> H} NMR spectrum (100.6 MHz, C <sub>6</sub> D <sub>6</sub> , 300 K) of isolated crystals of 3. ....  | 9         |
| Figure S7. <sup>1</sup> H NMR (400.1 MHz, C <sub>6</sub> D <sub>6</sub> , 300 K) of isolated crystals of 4. ....                             | 10        |
| Figure S8. <sup>13</sup> C{ <sup>1</sup> H} NMR spectrum (100.6 MHz, C <sub>6</sub> D <sub>6</sub> , 300 K) of isolated crystals of 4. ....  | 10        |
| Figure S9. <sup>1</sup> H NMR (400.1 MHz, C <sub>6</sub> D <sub>6</sub> , 300 K) of isolated crystals of 5. ....                             | 11        |
| Figure S10. <sup>13</sup> C{ <sup>1</sup> H} NMR spectrum (100.6 MHz, C <sub>6</sub> D <sub>6</sub> , 300 K) of isolated crystals of 5. .... | 11        |
| Figure S11. <sup>1</sup> H NMR (400.1 MHz, [D] <sub>8</sub> toluene, 300 K) of isolated crystals of 6. ....                                  | 12        |
| Figure S12. <sup>13</sup> C{ <sup>1</sup> H} NMR spectrum (100.6 MHz, [D] <sub>8</sub> toluene, 300 K) of isolated crystals of 6. ....       | 12        |
| Figure S13. <sup>1</sup> H NMR (400.1 MHz, C <sub>6</sub> D <sub>6</sub> , 300 K) of isolated crystals of 7. ....                            | 13        |
| Figure S14. <sup>13</sup> C{ <sup>1</sup> H} NMR spectrum (100.6 MHz, C <sub>6</sub> D <sub>6</sub> , 300 K) of isolated crystals of 7. .... | 13        |
| Figure S15. <sup>1</sup> H NMR (400.1 MHz, C <sub>6</sub> D <sub>6</sub> , 300 K) of isolated crystals of 8. ....                            | 14        |
| Figure S16. <sup>13</sup> C{ <sup>1</sup> H} NMR spectrum (100.6 MHz, C <sub>6</sub> D <sub>6</sub> , 300 K) of isolated crystals of 8. .... | 14        |
| Figure S17. <sup>1</sup> H NMR (400.1 MHz, C <sub>6</sub> D <sub>6</sub> , 300 K) of isolated crystals of 9. ....                            | 15        |
| Figure S18. <sup>13</sup> C{ <sup>1</sup> H} NMR spectrum (100.6 MHz, C <sub>6</sub> D <sub>6</sub> , 300 K) of isolated crystals of 9. .... | 15        |
| Figure S19. <sup>1</sup> H NMR (400.1 MHz, C <sub>6</sub> D <sub>12</sub> , 300 K) of isolated crystals of 10. ....                          | 16        |
| Figure S20. <sup>13</sup> C NMR (100.6 MHz, C <sub>6</sub> D <sub>12</sub> , 300 K) of isolated crystals of 10. ....                         | 16        |
| Figure S21. <sup>1</sup> H NMR (400.1 MHz, C <sub>6</sub> D <sub>6</sub> , 300 K) of isolated crystals of 10. ....                           | 17        |
| Figure S22. <sup>1</sup> H NMR (400.1 MHz, C <sub>6</sub> D <sub>6</sub> , 300 K) of TMEEA. ....                                             | 17        |
| Figure S23. <sup>1</sup> H NMR (400.1 MHz, C <sub>6</sub> D <sub>6</sub> , 300 K) of isolated crystals of 11. ....                           | 18        |
| Figure S24. <sup>13</sup> C NMR (100.6 MHz, C <sub>6</sub> D <sub>6</sub> , 300 K) of isolated crystals of 11. ....                          | 18        |
| Figure S25. <sup>1</sup> H, <sup>13</sup> C-HSQC 1H NMR (400.1 MHz, C <sub>6</sub> D <sub>6</sub> , 300 K) of isolated crystals of 11. ....  | 19        |
| Figure S26. <sup>1</sup> H, <sup>13</sup> C-HSQC NMR (400.1 MHz, C <sub>6</sub> D <sub>6</sub> , 300 K) of isolated crystals of 11. ....     | 19        |
| <b>Solution <sup>1</sup>H DOSY NMR Studies</b> .....                                                                                         | <b>20</b> |
| NMR Spectroscopic Analysis Details.....                                                                                                      | 20        |
| DOSY NMR Samples Preparation .....                                                                                                           | 20        |
| <sup>1</sup> H DOSY NMR spectroscopic study of 1 in C <sub>6</sub> D <sub>6</sub> solution .....                                             | 21        |
| <sup>1</sup> H DOSY NMR spectroscopic study of 3 in C <sub>6</sub> D <sub>6</sub> solution .....                                             | 22        |
| <sup>1</sup> H DOSY NMR spectroscopic study of 3 in D <sub>8</sub> -THF solution .....                                                       | 23        |
| <sup>1</sup> H DOSY NMR spectroscopic study of 4 in C <sub>6</sub> D <sub>6</sub> solution .....                                             | 24        |
| <sup>1</sup> H DOSY NMR spectroscopic study of 4 in D <sub>8</sub> -THF solution .....                                                       | 26        |
| <sup>1</sup> H DOSY NMR spectroscopic study of 6 in D <sub>8</sub> -toluene solution .....                                                   | 27        |
| <sup>1</sup> H DOSY NMR spectroscopic study of 6 in D <sub>8</sub> -THF solution .....                                                       | 28        |
| <sup>1</sup> H DOSY NMR spectroscopic study of 8 in C <sub>6</sub> D <sub>6</sub> solution .....                                             | 29        |
| <sup>1</sup> H DOSY NMR spectroscopic study of 8 in C <sub>6</sub> D <sub>6</sub> solution .....                                             | 31        |
| <sup>1</sup> H DOSY NMR spectroscopic study of 10 in C <sub>6</sub> D <sub>6</sub> solution .....                                            | 32        |

|                                                                                                      |           |
|------------------------------------------------------------------------------------------------------|-----------|
| <b><sup>1</sup>H DOSY NMR spectroscopic study of 10 in D<sub>8</sub>-THF solution .....</b>          | <b>33</b> |
| <b><sup>1</sup>H DOSY NMR spectroscopic study of 11 in C<sub>6</sub>D<sub>6</sub> solution .....</b> | <b>34</b> |
| <b><sup>1</sup>H DOSY NMR spectroscopic study of 11 in D<sub>8</sub>-THF solution .....</b>          | <b>35</b> |
| <b>REFERENCES .....</b>                                                                              | <b>36</b> |

## CRYSTALLOGRAPHIC AND REFINEMENT DATA

Single-crystal X-ray diffraction intensities were measured at 123(2) K on Oxford Diffraction Xcalibur and Gemini diffractometers with monochromated Mo ( $\lambda = 0.71073 \text{ \AA}$ ) or Cu ( $\lambda = 1.5418 \text{ \AA}$ ) radiation. The structures were solved by direct methods and refined to convergence on  $F^2$  and against all independent reflections by full-matrix least-squares and SHELXL programs.<sup>[1]</sup> Structure **10** as treated as a merohedral twin with the two parts related by matrix 1 0 0 0 -1 0 0 0 -1. The BASF parameter refined to 0.40229. Some structures featured disordered groups. These were all modeled over two sites and required restraints on bond lengths and displacement parameters to be applied. Groups treated in this way were the THF ligands of **3**, SiMe<sub>3</sub> and TMEDA groups in **4**, toluene solvate molecules in **6** and **9**, and the chelating ligand in one of the independent molecules of **10**. Selected crystallographic data and refinement parameters are summarized in the Tables S1 and S2 and full details are given in the supplementary deposited cif files. These data can be obtained free of charge from the Cambridge Crystallographic Data Centre via [http://www.ccdc.cam.ac.uk/data\\_request/cif](http://www.ccdc.cam.ac.uk/data_request/cif). Deposition numbers CCDC 1537847 to 1537857.

Table S1. Selected crystallographic and refinement data for **1-5**.

| Compound                                                 | <b>1</b>                                                                      | <b>2</b>                                                                      | <b>3</b>                                                                                     | <b>4</b>                                                                      | <b>5</b>                                                                      |
|----------------------------------------------------------|-------------------------------------------------------------------------------|-------------------------------------------------------------------------------|----------------------------------------------------------------------------------------------|-------------------------------------------------------------------------------|-------------------------------------------------------------------------------|
| Formula                                                  | C <sub>19</sub> H <sub>44</sub> K <sub>2</sub> N <sub>2</sub> Si <sub>4</sub> | C <sub>26</sub> H <sub>52</sub> K <sub>2</sub> N <sub>2</sub> Si <sub>4</sub> | C <sub>20</sub> H <sub>52</sub> K <sub>2</sub> N <sub>2</sub> O <sub>2</sub> Si <sub>4</sub> | C <sub>24</sub> H <sub>68</sub> K <sub>2</sub> N <sub>6</sub> Si <sub>4</sub> | C <sub>32</sub> H <sub>80</sub> K <sub>2</sub> N <sub>6</sub> Si <sub>4</sub> |
| FW                                                       | 491.12                                                                        | 583.25                                                                        | 543.20                                                                                       | 631.40                                                                        | 739.58                                                                        |
| Crystal system                                           | Triclinic                                                                     | Monoclinic                                                                    | Monoclinic                                                                                   | Monoclinic                                                                    | Orthorhombic                                                                  |
| Space group                                              | <i>P</i> -1                                                                   | <i>C</i> 2/ <i>c</i>                                                          | <i>P</i> 2 <sub>1</sub> / <i>n</i>                                                           | <i>P</i> 2 <sub>1</sub> / <i>c</i>                                            | <i>P</i> 2 <sub>1</sub> 2 <sub>1</sub> 2 <sub>1</sub>                         |
| Wavelength/Å                                             | 1.54184                                                                       | 1.54184                                                                       | 0.71073                                                                                      | 0.71073                                                                       | 0.71073                                                                       |
| <i>a</i> /Å                                              | 9.7944(5)                                                                     | 13.1668(11)                                                                   | 11.0570(8)                                                                                   | 25.0098(6)                                                                    | 11.8251(2)                                                                    |
| <i>b</i> /Å                                              | 10.5685(6)                                                                    | 17.0453(11)                                                                   | 12.1726(10)                                                                                  | 41.6744(9)                                                                    | 11.9313(3)                                                                    |
| <i>c</i> /Å                                              | 16.9623(7)                                                                    | 15.7608(12)                                                                   | 12.3879(9)                                                                                   | 11.7634(3)                                                                    | 32.6567(8)                                                                    |
| $\alpha$ /°                                              | 90.218(4)                                                                     | 90                                                                            | 90                                                                                           | 90                                                                            | 90                                                                            |
| $\beta$ /°                                               | 105.593(4)                                                                    | 95.649(7)                                                                     | 106.209(7)                                                                                   | 91.606(2)                                                                     | 90                                                                            |
| $\gamma$ /°                                              | 117.417(5)                                                                    | 90                                                                            | 90                                                                                           | 90                                                                            | 90                                                                            |
| Volume/Å <sup>3</sup>                                    | 1484.42(14)                                                                   | 3520.1(5)                                                                     | 1601.0(2)                                                                                    | 12255.8(5)                                                                    | 4607.50(18)                                                                   |
| <i>Z</i>                                                 | 2                                                                             | 4                                                                             | 4                                                                                            | 12                                                                            | 4                                                                             |
| Temperature/ <i>K</i>                                    | 123(2)                                                                        | 123(2)                                                                        | 123(2)                                                                                       | 123(2)                                                                        | 123(2)                                                                        |
| Refls. Collect.                                          | 14198                                                                         | 15089                                                                         | 10471                                                                                        | 68311                                                                         | 26058                                                                         |
| Refls. Unique                                            | 5806                                                                          | 3288                                                                          | 4235                                                                                         | 26683                                                                         | 9964                                                                          |
| Refls. Obs.                                              | 5512                                                                          | 2463                                                                          | 3459                                                                                         | 16447                                                                         | 9328                                                                          |
| No. Parameters                                           | 257                                                                           | 205                                                                           | 155                                                                                          | 1121                                                                          | 417                                                                           |
| 2 $\theta$ <sub>max</sub>                                | 146.06                                                                        | 139.94                                                                        | 59.97                                                                                        | 54.00                                                                         | 54.00                                                                         |
| <i>R</i> <sub>int</sub>                                  | 0.0226                                                                        | 0.0497                                                                        | 0.0302                                                                                       | 0.0249                                                                        | 0.0295                                                                        |
| Goodness of fit                                          | 1.075                                                                         | 1.165                                                                         | 1.060                                                                                        | 0.950                                                                         | 1.099                                                                         |
| <i>R</i> [ <i>F</i> <sup>2</sup> >2 $\sigma$ ], <i>F</i> | 0.0396                                                                        | 0.0416                                                                        | 0.0363                                                                                       | 0.0485                                                                        | 0.0368                                                                        |
| <i>R</i> <sub>w</sub> (all data), <i>F</i> <sup>2</sup>  | 0.1167                                                                        | 0.1353                                                                        | 0.0842                                                                                       | 0.1135                                                                        | 0.0771                                                                        |
| Abs. Struct.                                             | -                                                                             | -                                                                             | -                                                                                            | -                                                                             | 0.009(15) <sup>a</sup>                                                        |

<sup>a</sup> The refined Flack parameter is essentially zero and indicates that compound **5** is enantiomerically pure.

Table S2. Selected crystallographic and refinement data for **6-11**.

| Compound                | <b>6</b>                    | <b>7</b>                 | <b>8</b>                     | <b>9</b>                         | <b>10</b>                 | <b>11</b>                 |
|-------------------------|-----------------------------|--------------------------|------------------------------|----------------------------------|---------------------------|---------------------------|
| Formula                 | $C_{35}H_{76}K_2N_2O_8Si_4$ | $C_{21}H_{59}K_2N_5Si_4$ | $C_{40}H_{112}K_4N_8O_2Si_8$ | $C_{59.2}H_{144.8}K_4N_{12}Si_8$ | $C_{22}H_{58}KN_5O_2Si_2$ | $C_{21}H_{51}KN_2O_6Si_2$ |
| FW                      | 843.54                      | 572.29                   | 1118.49                      | 1406.19                          | 520.01                    | 522.91                    |
| Crystal system          | Monoclinic                  | Monoclinic               | Monoclinic                   | Triclinic                        | Monoclinic                | Triclinic                 |
| Space group             | $P2_1/c$                    | $P2_1/n$                 | $P2_1/n$                     | $P-1$                            | $P2_1/a$                  | $P-1$                     |
| Wavelength/Å            | 0.71073                     | 1.54184                  | 1.54184                      | 0.71073                          | 1.54184                   | 0.71073                   |
| $a/\text{Å}$            | 12.4604(4)                  | 12.12710(15)             | 12.81770(10)                 | 12.2066(4)                       | 22.8421(6)                | 10.3630(6)                |
| $b/\text{Å}$            | 12.4931(3)                  | 19.12980(16)             | 16.92720(10)                 | 12.8113(4)                       | 16.2474(4)                | 10.6131(6)                |
| $c/\text{Å}$            | 16.0780(5)                  | 15.53110(14)             | 15.89150(10)                 | 15.0375(4)                       | 17.8186(6)                | 15.7120(6)                |
| $\alpha/^\circ$         | 90                          | 90                       | 90                           | 79.045(3)                        | 90                        | 88.518(4)                 |
| $\beta/^\circ$          | 107.587(3)                  | 99.4140(10)              | 98.4790(10)                  | 81.833(2)                        | 90.091(2)                 | 84.889(4)                 |
| $\gamma/^\circ$         | 90                          | 90                       | 90                           | 79.141(3)                        | 90                        | 61.994(6)                 |
| Volume/Å <sup>3</sup>   | 2385.86(12)                 | 3554.52(6)               | 3410.26(4)                   | 2253.60(12)                      | 6612.9(3)                 | 1519.39(16)               |
| Z                       | 2                           | 4                        | 2                            | 1                                | 8                         | 2                         |
| Temperature/K           | 123(2)                      | 123(2)                   | 123(2)                       | 123(2)                           | 123(2)                    | 123(2)                    |
| Refls. Collect.         | 17250                       | 44210                    | 36566                        | 22235                            | 52705                     | 54199                     |
| Reflns. Unique          | 5630                        | 7082                     | 6767                         | 10995                            | 12697                     | 8527                      |
| Reflns. Obs.            | 4539                        | 6436                     | 5991                         | 8648                             | 10533                     | 7331                      |
| No.                     | 268                         | 317                      | 296                          | 405                              | 690                       | 298                       |
| Parameters              |                             |                          |                              |                                  |                           |                           |
| $2\theta_{\max}$        | 56                          | 146.75                   | 146.22                       | 59.40                            | 146.72                    | 60.49                     |
| $R_{\text{int}}$        | 0.0298                      | 0.0358                   | 0.0302                       | 0.0245                           | 0.0609                    | 0.0360                    |
| Goodness of fit         | 1.221                       | 1.042                    | 1.073                        | 1.064                            | 1.051                     | 1.034                     |
| $R[F^2 > 2\sigma], F$   | 0.0522                      | 0.0331                   | 0.0306                       | 0.0609                           | 0.0505                    | 0.0295                    |
| $R_w$ (all data), $F^2$ | 0.1182                      | 0.0901                   | 0.0853                       | 0.1711                           | 0.1457                    | 0.0752                    |

## NMR SPECTRA

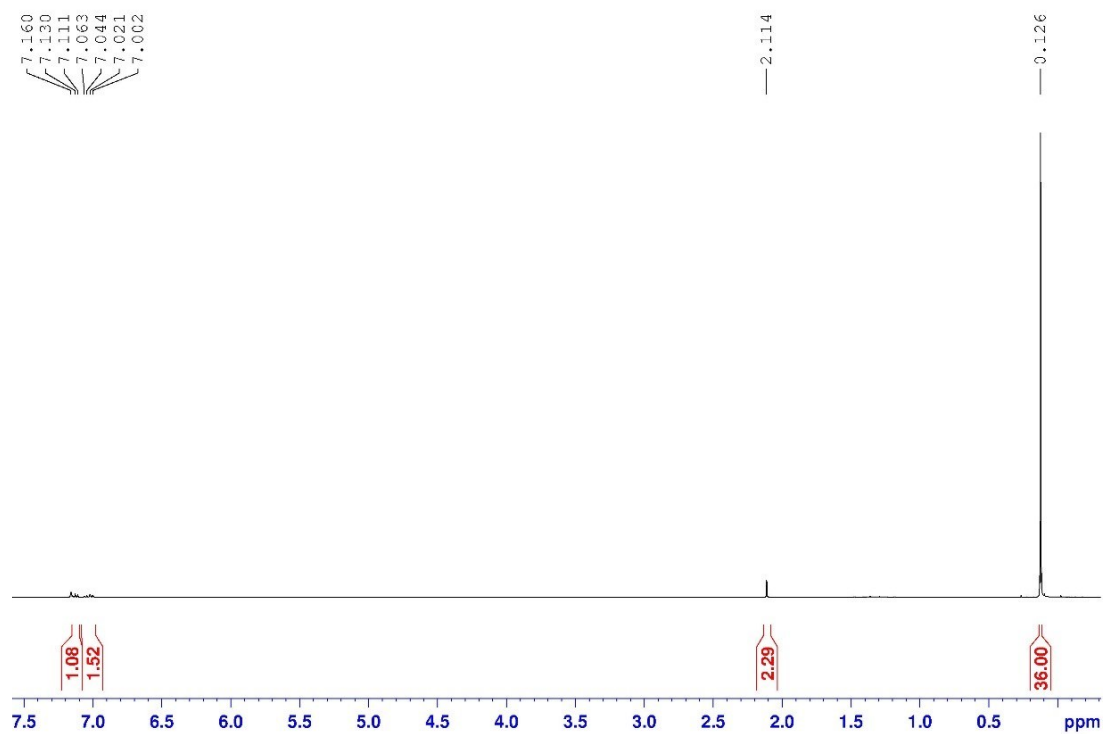

Figure S1.  $^1\text{H}$  NMR (400.1 MHz,  $\text{C}_6\text{D}_6$ , 300 K) of isolated crystals of **1**.

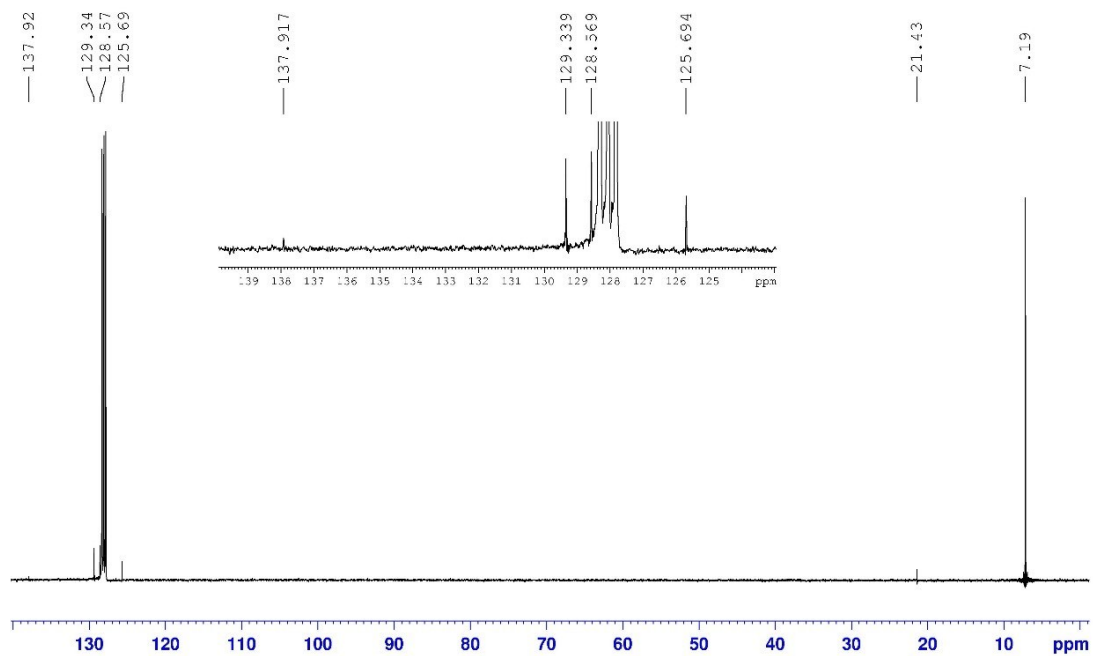

Figure S2.  $^{13}\text{C}\{^1\text{H}\}$  NMR spectrum (100.6 MHz,  $\text{C}_6\text{D}_6$ , 300 K) of isolated crystals of **1**.

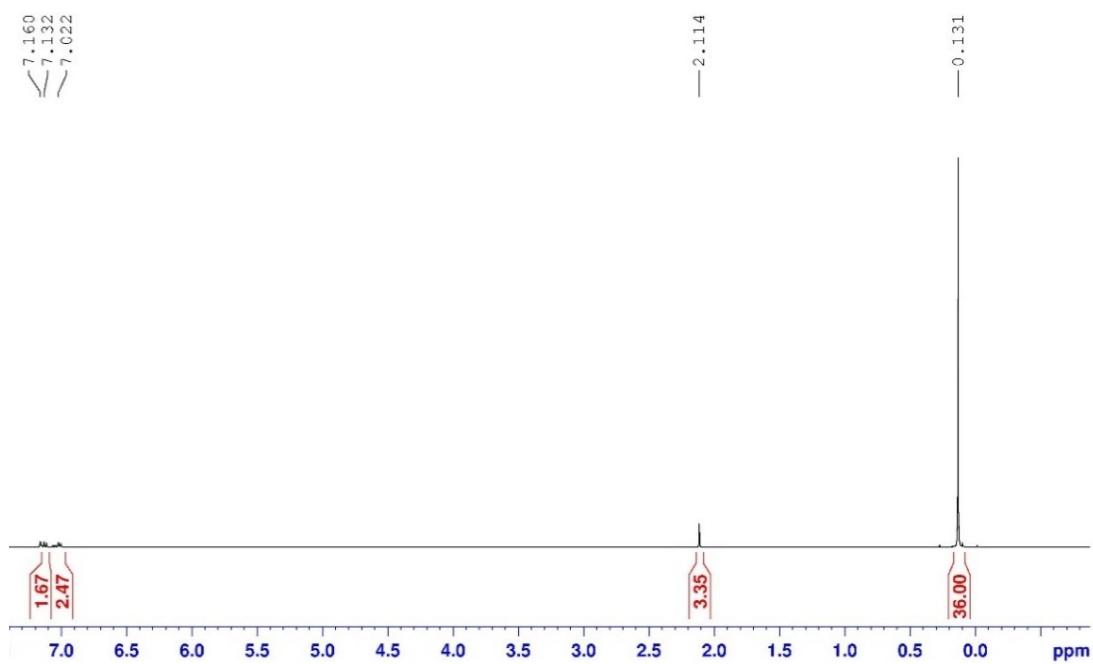

Figure S3.  $^1\text{H}$  NMR (400.1 MHz,  $\text{C}_6\text{D}_6$ , 300 K) of isolated crystals of **2**.

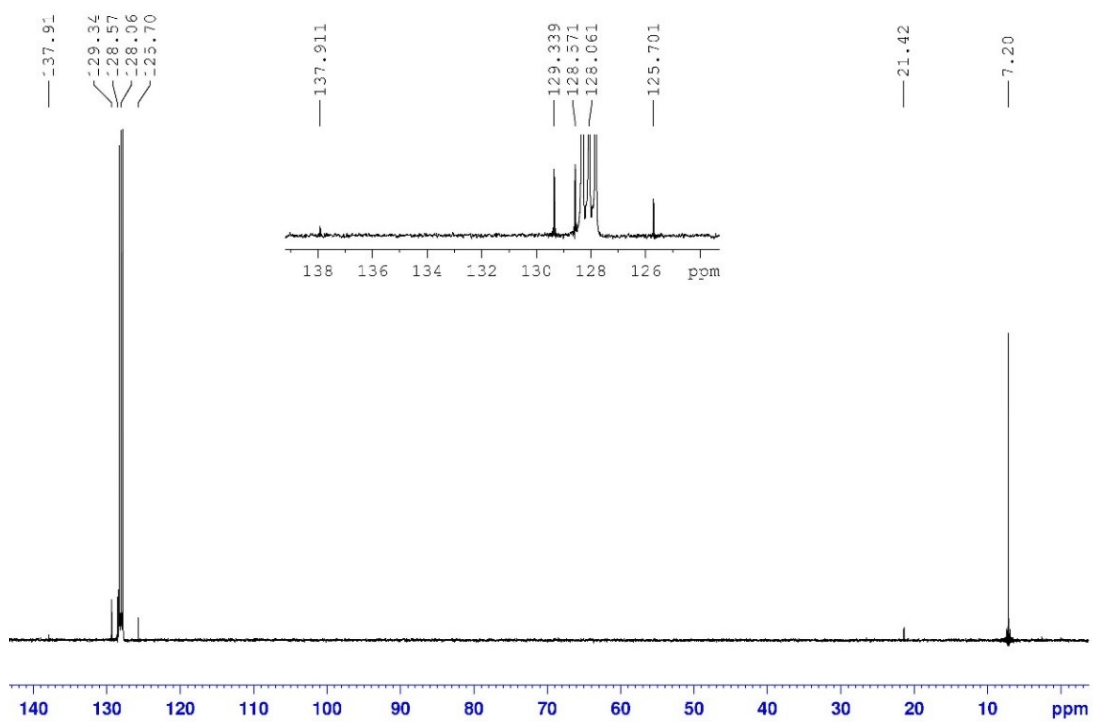

Figure S4.  $^{13}\text{C}\{^1\text{H}\}$  NMR spectrum (100.6 MHz,  $\text{C}_6\text{D}_6$ , 300 K) of isolated crystals of **2**.



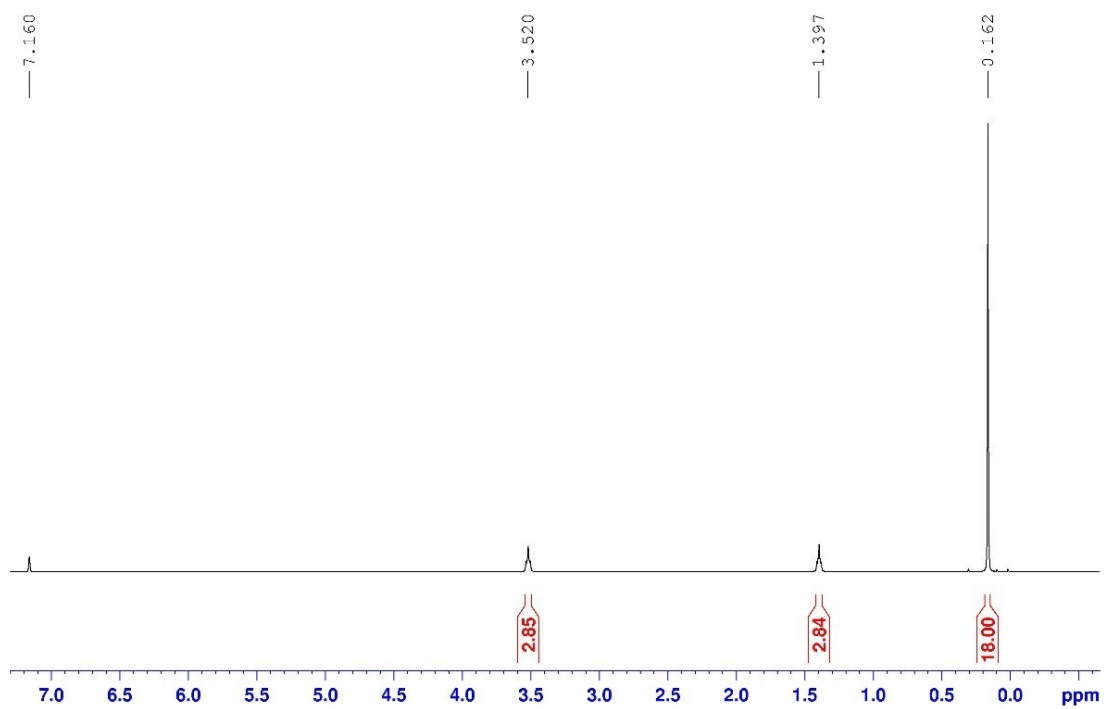

Figure S5.  $^1\text{H}$  NMR (400.1 MHz,  $\text{C}_6\text{D}_6$ , 300 K) of isolated crystals of **3**.

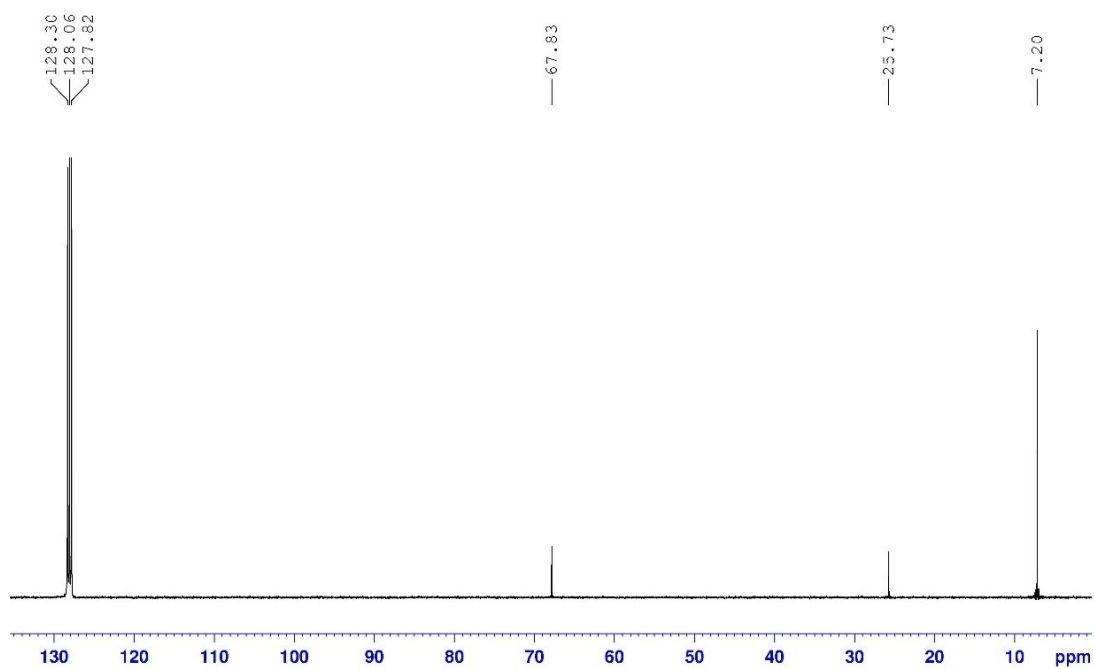

Figure S6.  $^{13}\text{C}\{^1\text{H}\}$  NMR spectrum (100.6 MHz,  $\text{C}_6\text{D}_6$ , 300 K) of isolated crystals of **3**.

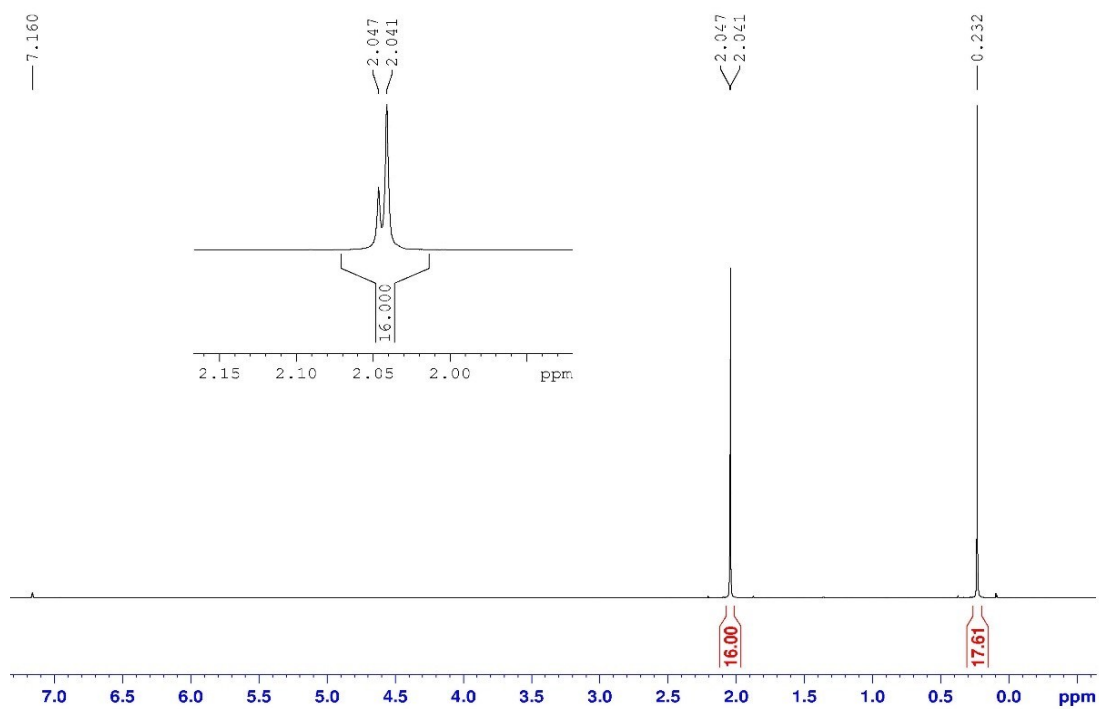

Figure S7.  $^1\text{H}$  NMR (400.1 MHz,  $\text{C}_6\text{D}_6$ , 300 K) of isolated crystals of **4**.

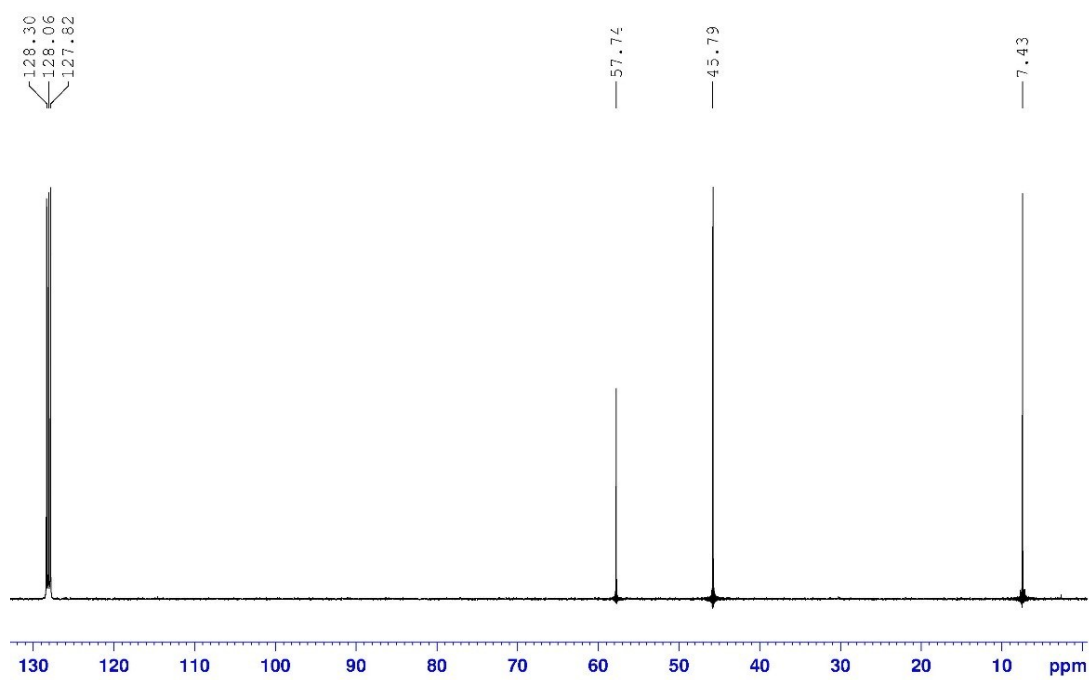

Figure S8.  $^{13}\text{C}\{^1\text{H}\}$  NMR spectrum (100.6 MHz,  $\text{C}_6\text{D}_6$ , 300 K) of isolated crystals of **4**.

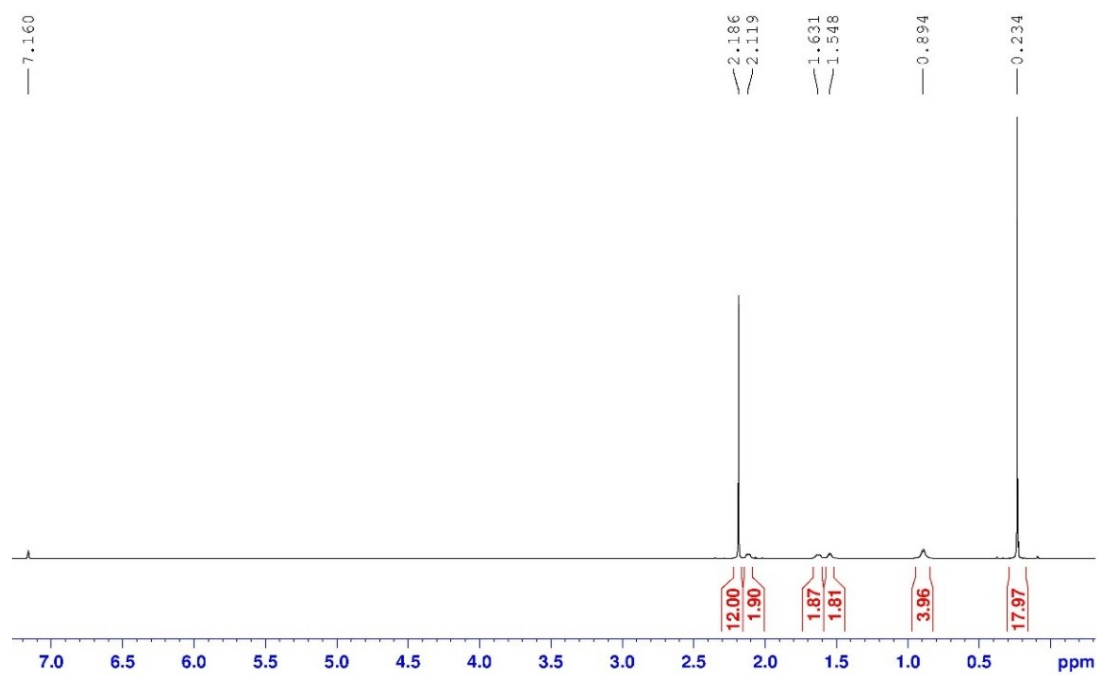

Figure S9.  $^1\text{H}$  NMR (400.1 MHz,  $\text{C}_6\text{D}_6$ , 300 K) of isolated crystals of **5**.

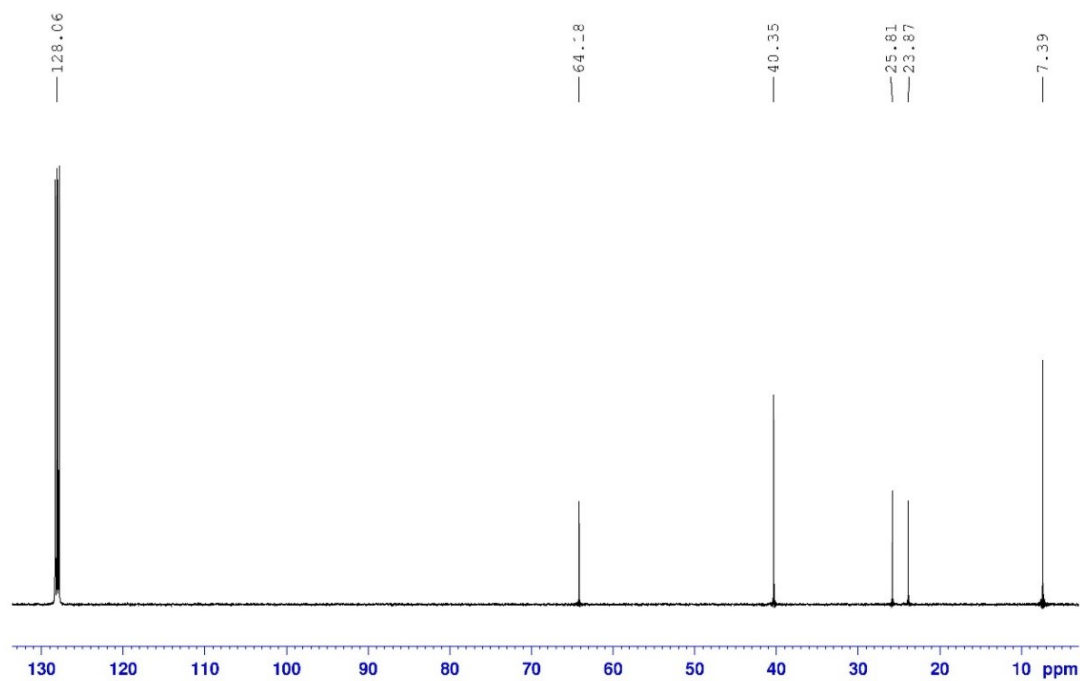

Figure S10.  $^{13}\text{C}\{^1\text{H}\}$  NMR spectrum (100.6 MHz,  $\text{C}_6\text{D}_6$ , 300 K) of isolated crystals of **5**.

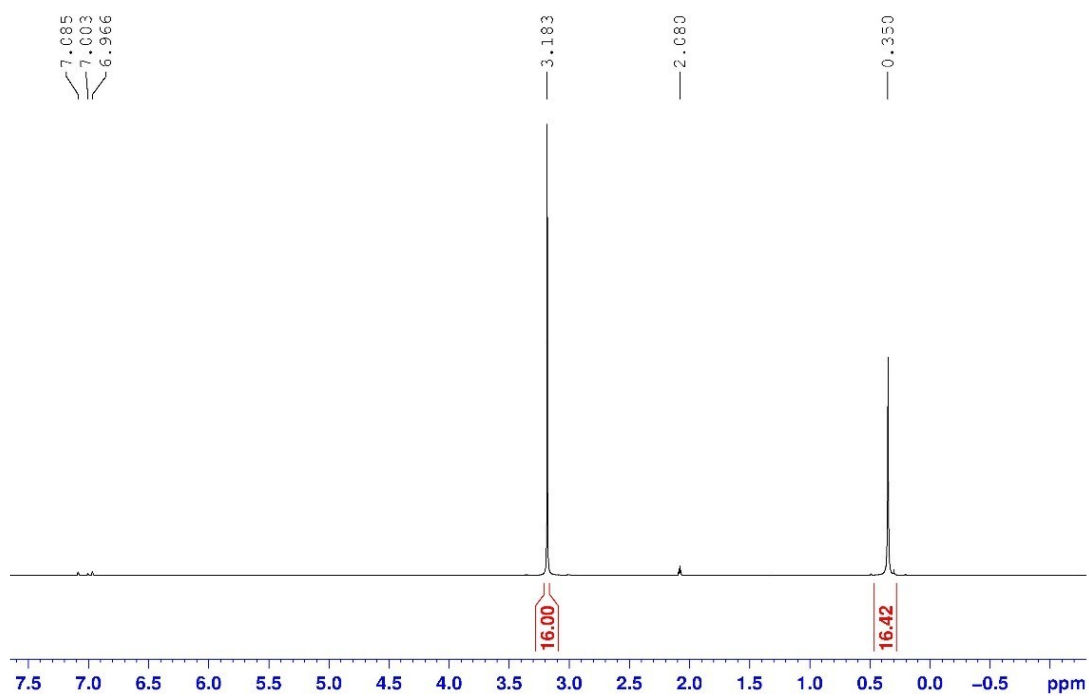

Figure S11.  $^1\text{H}$  NMR (400.1 MHz,  $[\text{D}]_8$ toluene, 300 K) of isolated crystals of **6**.

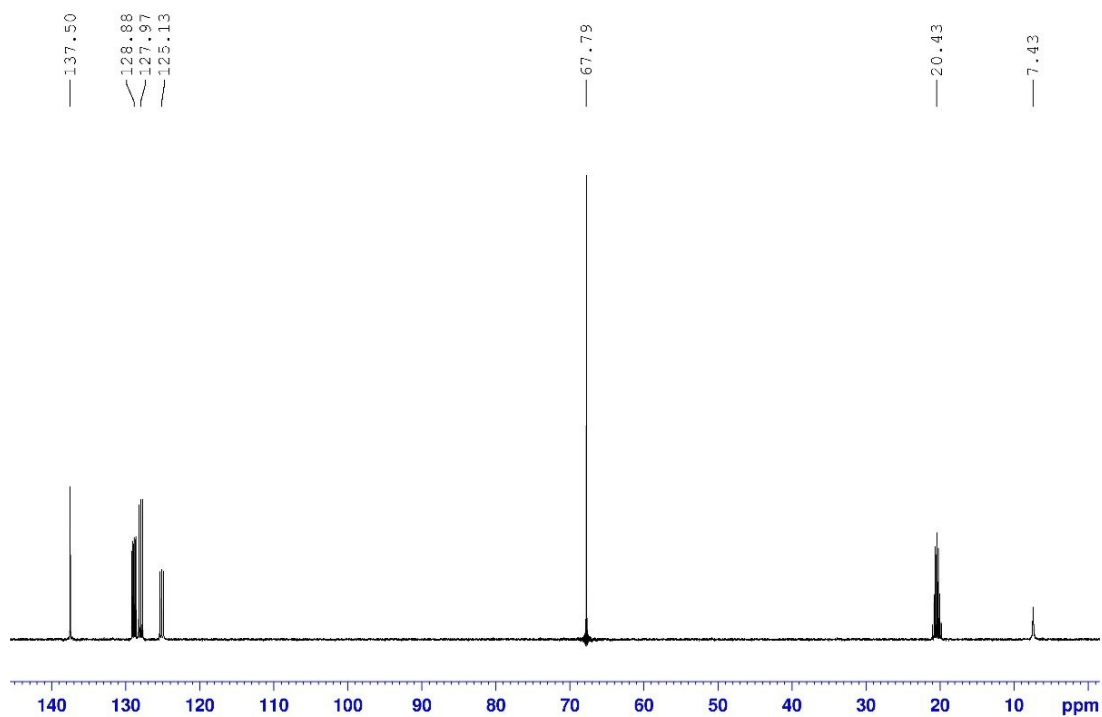

Figure S12.  $^{13}\text{C}\{^1\text{H}\}$  NMR spectrum (100.6 MHz,  $[\text{D}]_8$ toluene, 300 K) of isolated crystals of **6**.

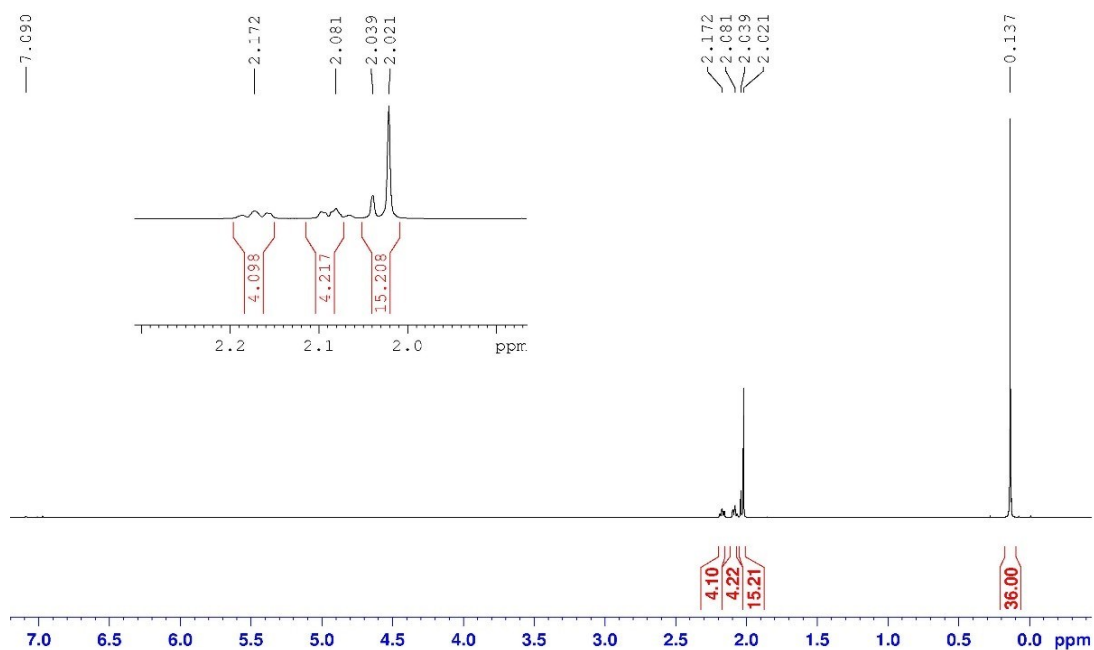

Figure S13.  $^1\text{H}$  NMR (400.1 MHz,  $\text{C}_6\text{D}_6$ , 300 K) of isolated crystals of **7**.

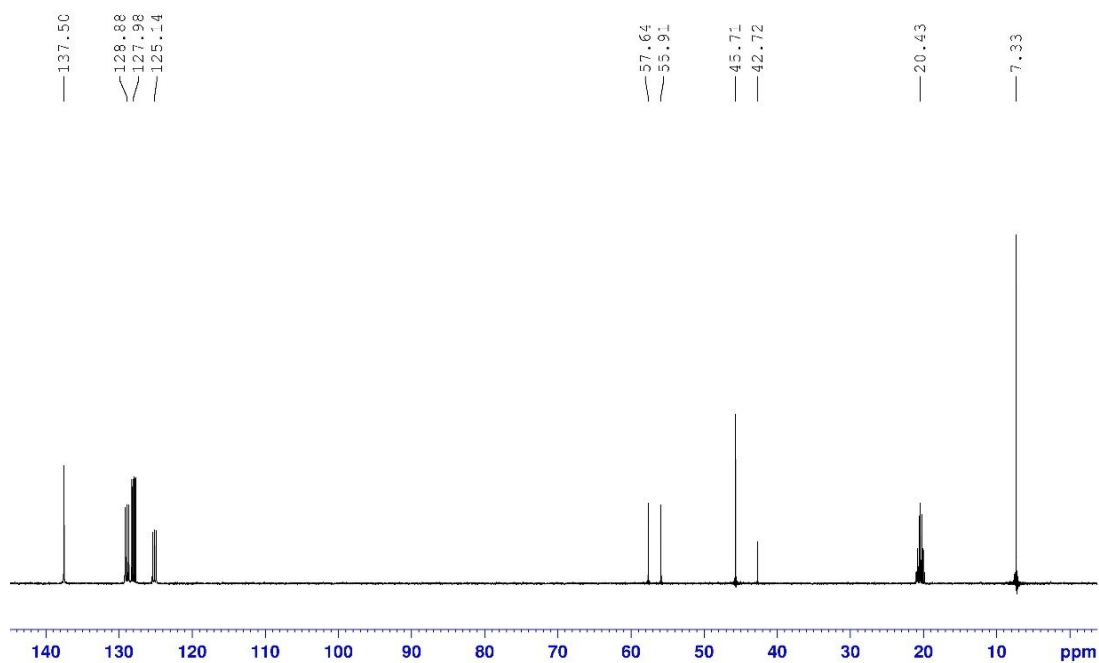

Figure S14.  $^{13}\text{C}\{^1\text{H}\}$  NMR spectrum (100.6 MHz,  $\text{C}_6\text{D}_6$ , 300 K) of isolated crystals of **7**.

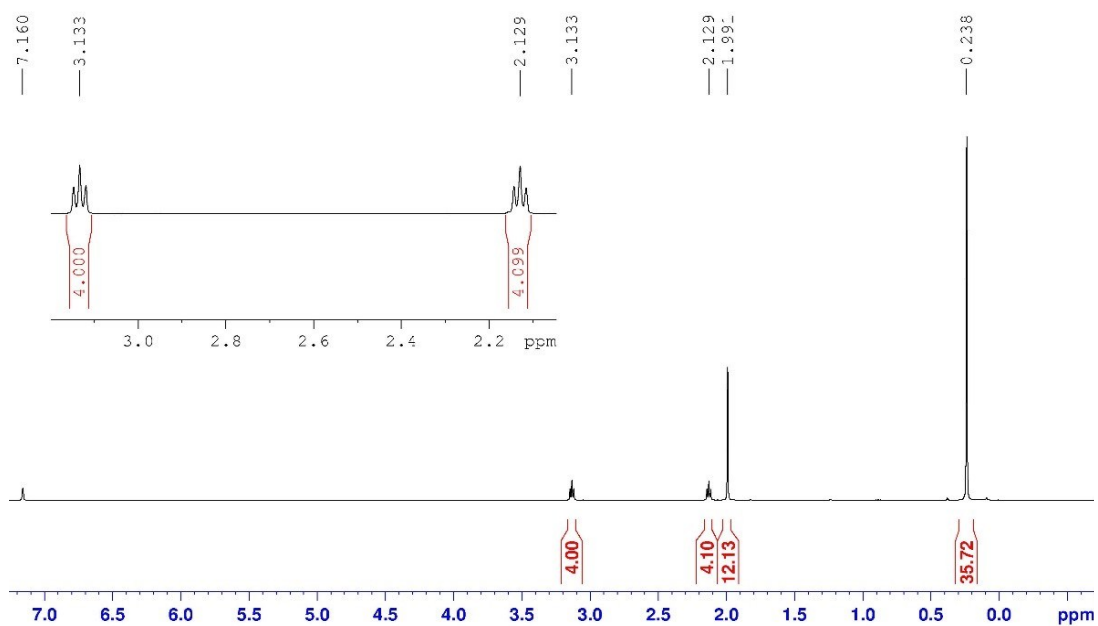

Figure S15.  $^1\text{H}$  NMR (400.1 MHz,  $\text{C}_6\text{D}_6$ , 300 K) of isolated crystals of **8**.

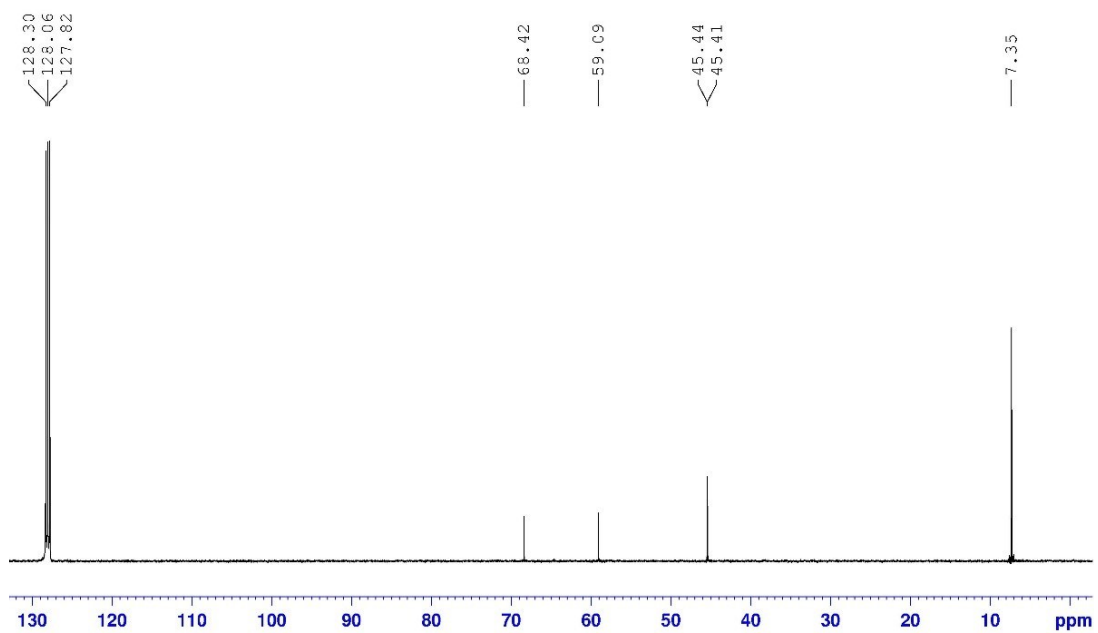

Figure S16.  $^{13}\text{C}\{^1\text{H}\}$  NMR spectrum (100.6 MHz,  $\text{C}_6\text{D}_6$ , 300 K) of isolated crystals of **8**.

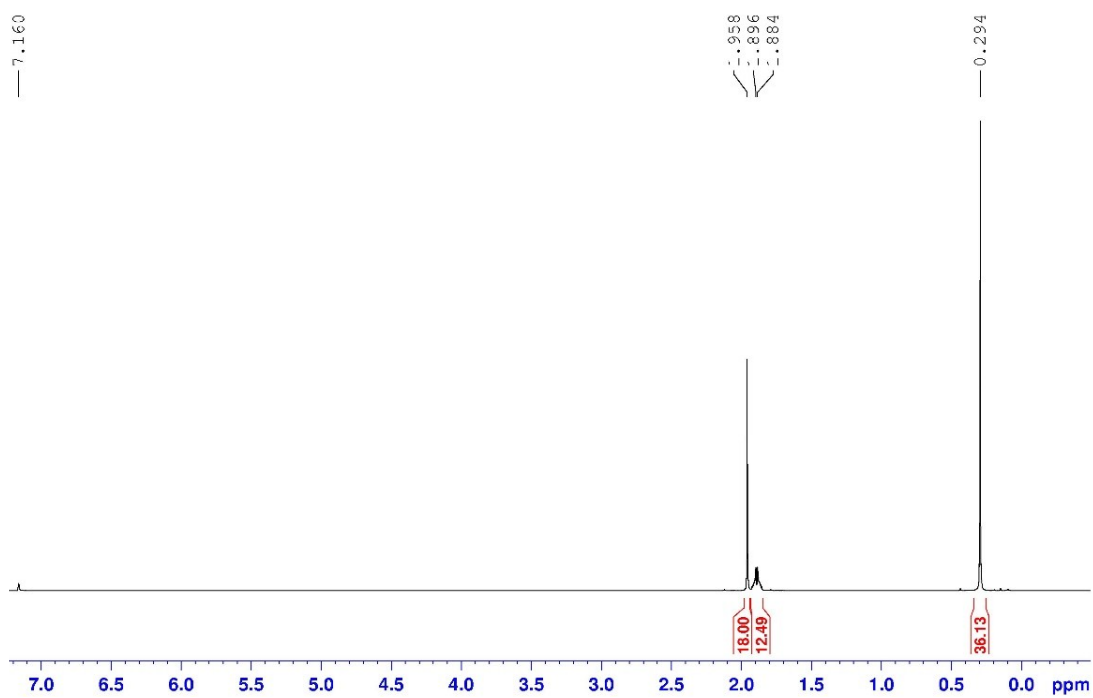

Figure S17.  $^1\text{H}$  NMR (400.1 MHz,  $\text{C}_6\text{D}_6$ , 300 K) of isolated crystals of **9**.

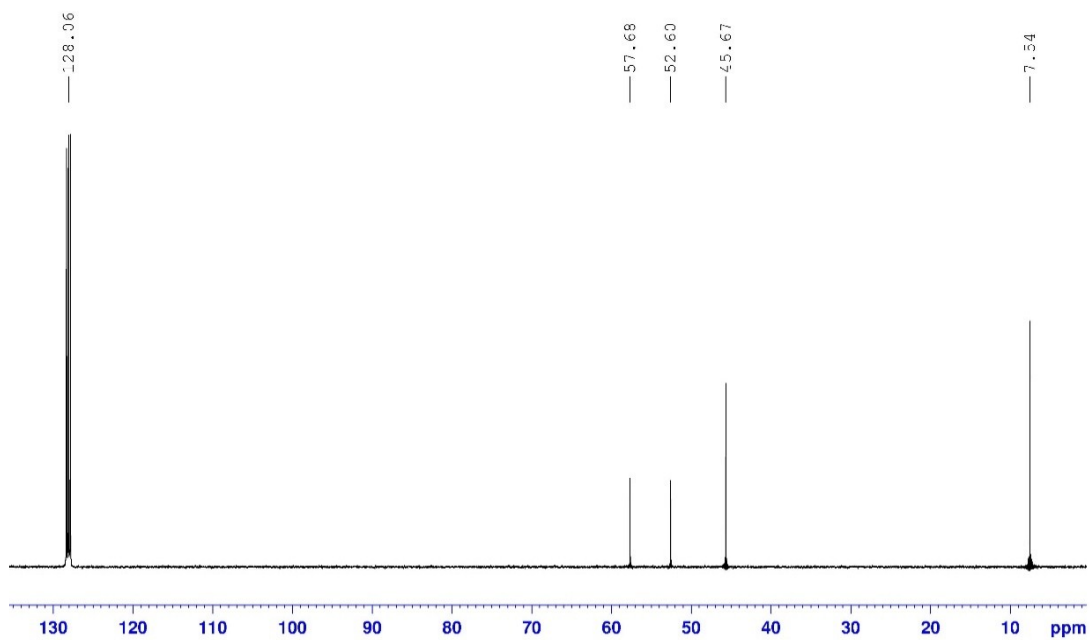

Figure S18.  $^{13}\text{C}\{^1\text{H}\}$  NMR spectrum (100.6 MHz,  $\text{C}_6\text{D}_6$ , 300 K) of isolated crystals of **9**.

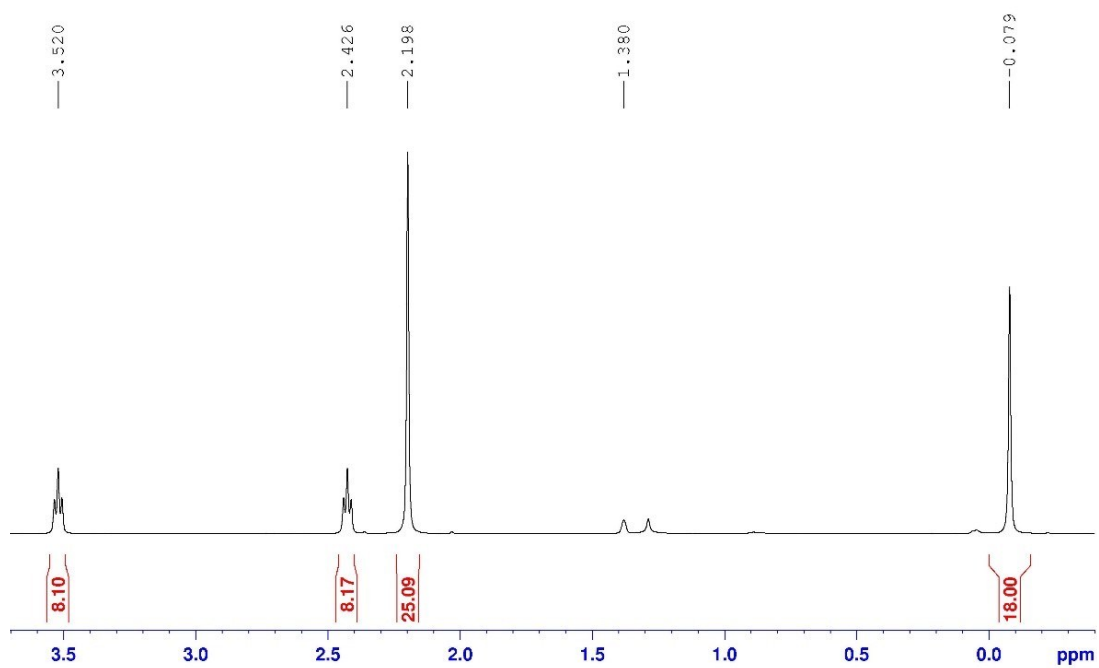

Figure S19.  $^1\text{H}$  NMR (400.1 MHz,  $\text{C}_6\text{D}_{12}$ , 300 K) of isolated crystals of **10**.

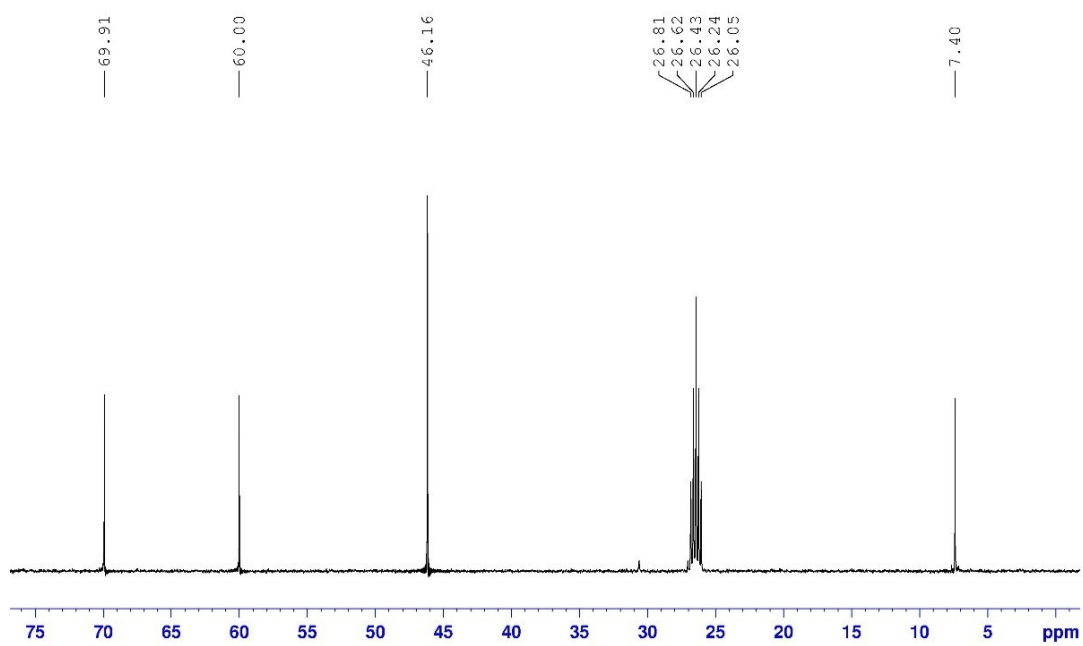

Figure S20.  $^{13}\text{C}$  NMR (100.6 MHz,  $\text{C}_6\text{D}_{12}$ , 300 K) of isolated crystals of **10**.



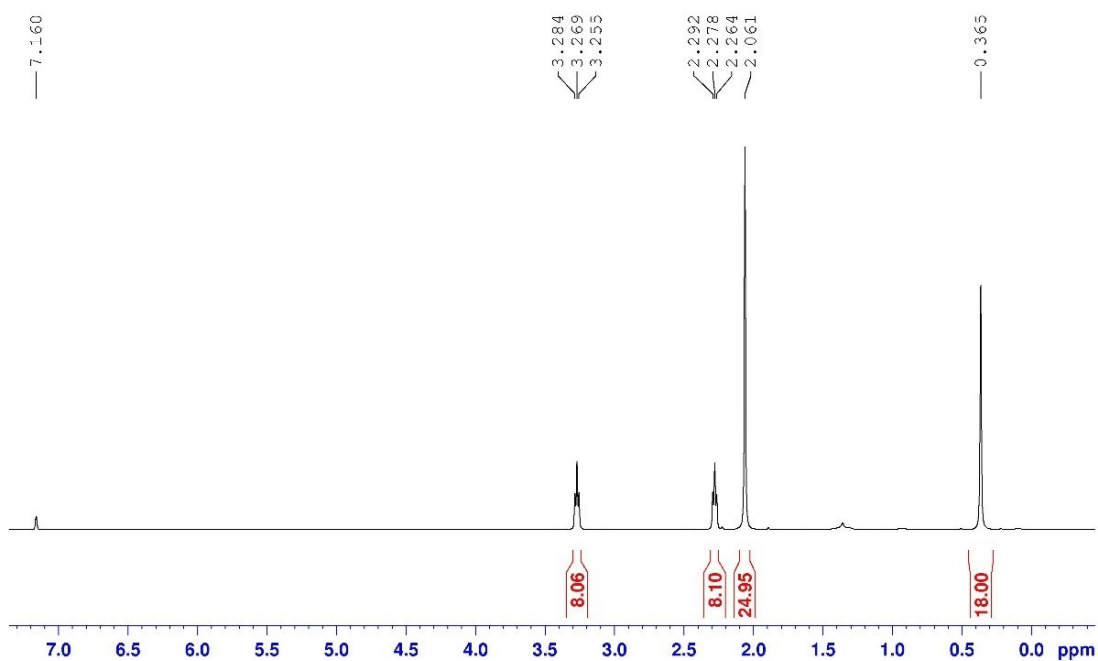

Figure S21.  $^1\text{H}$  NMR (400.1 MHz,  $\text{C}_6\text{D}_6$ , 300 K) of isolated crystals of **10**.

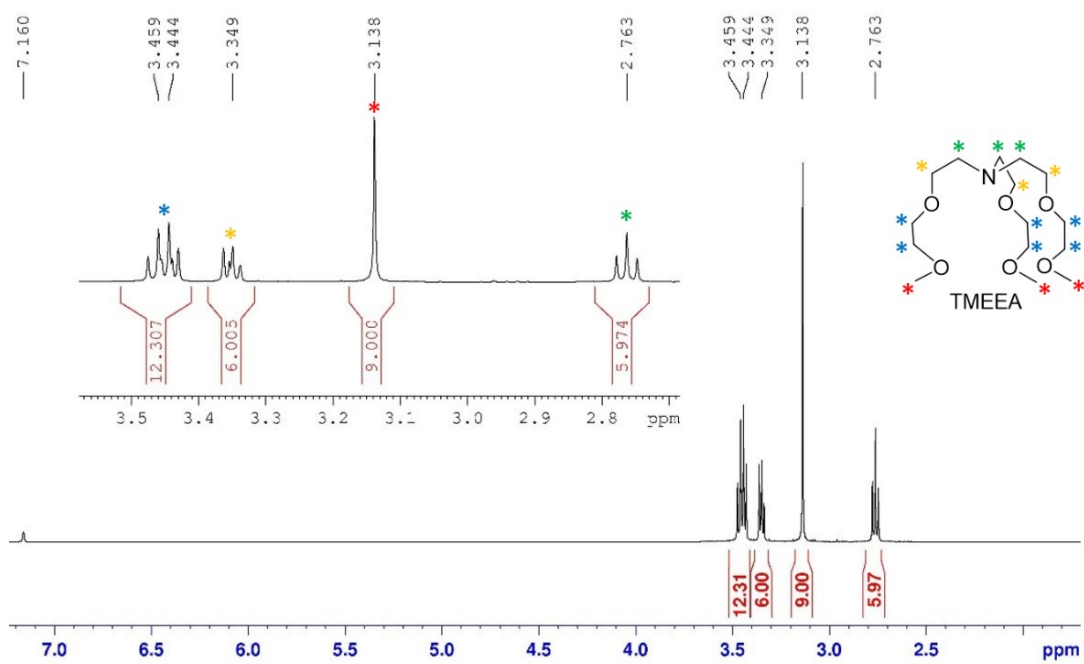

Figure S22.  $^1\text{H}$  NMR (400.1 MHz,  $\text{C}_6\text{D}_6$ , 300 K) of **TMEEA**.

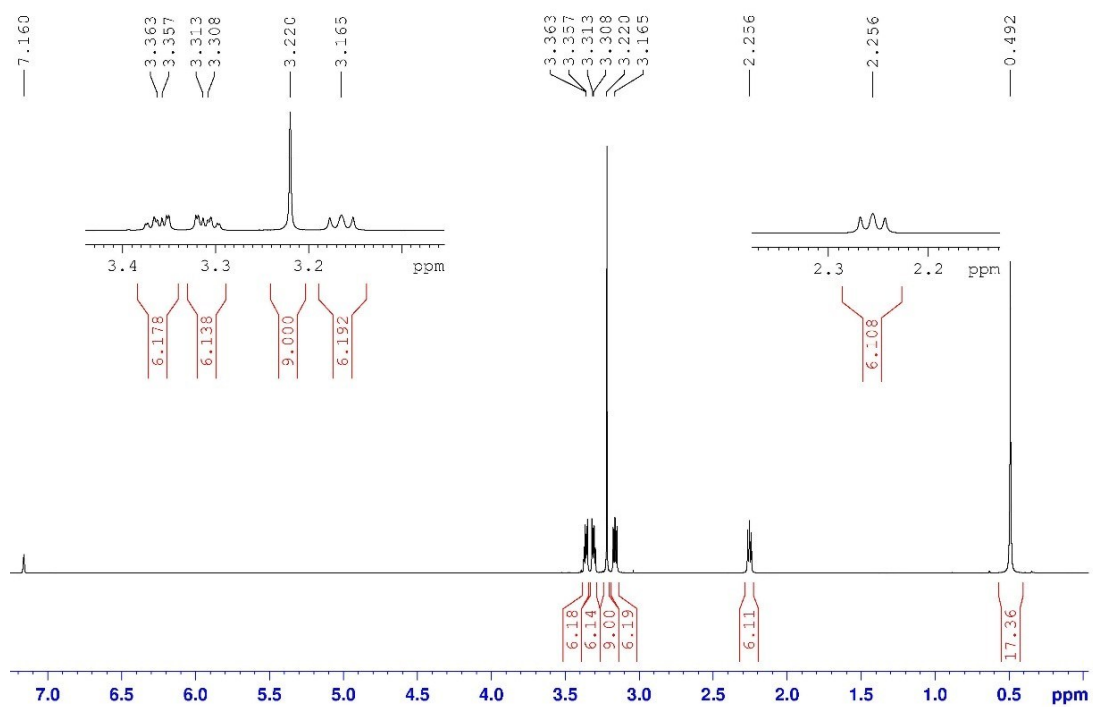

Figure S23.  $^1\text{H}$  NMR (400.1 MHz,  $\text{C}_6\text{D}_6$ , 300 K) of isolated crystals of **11**.

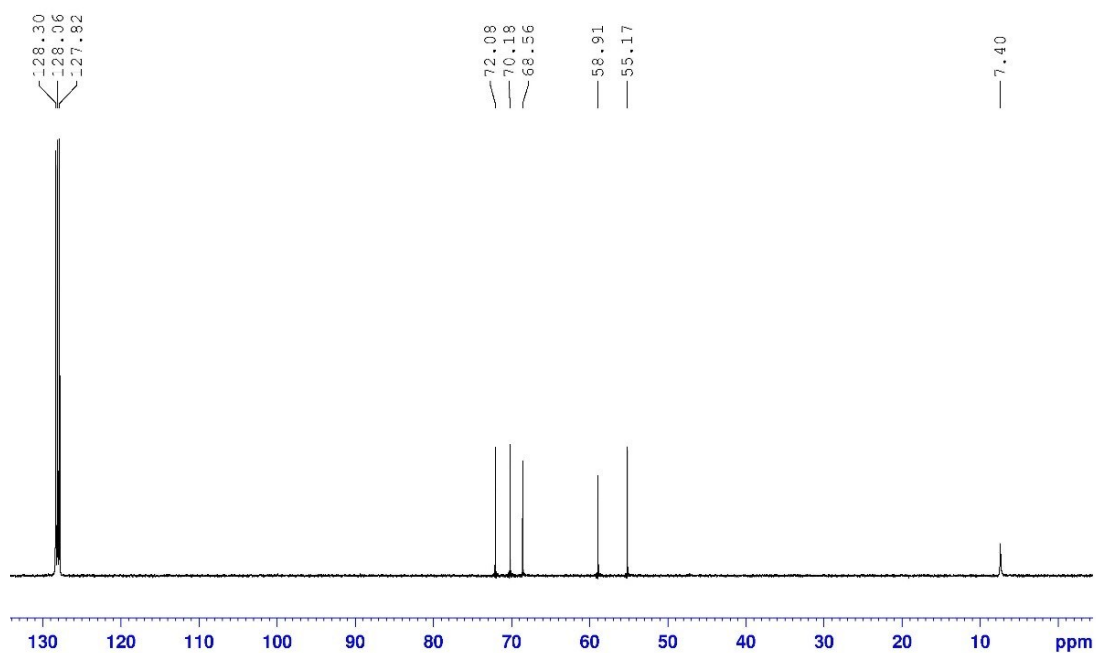

Figure S24.  $^{13}\text{C}$  NMR (100.6 MHz,  $\text{C}_6\text{D}_6$ , 300 K) of isolated crystals of **11**.

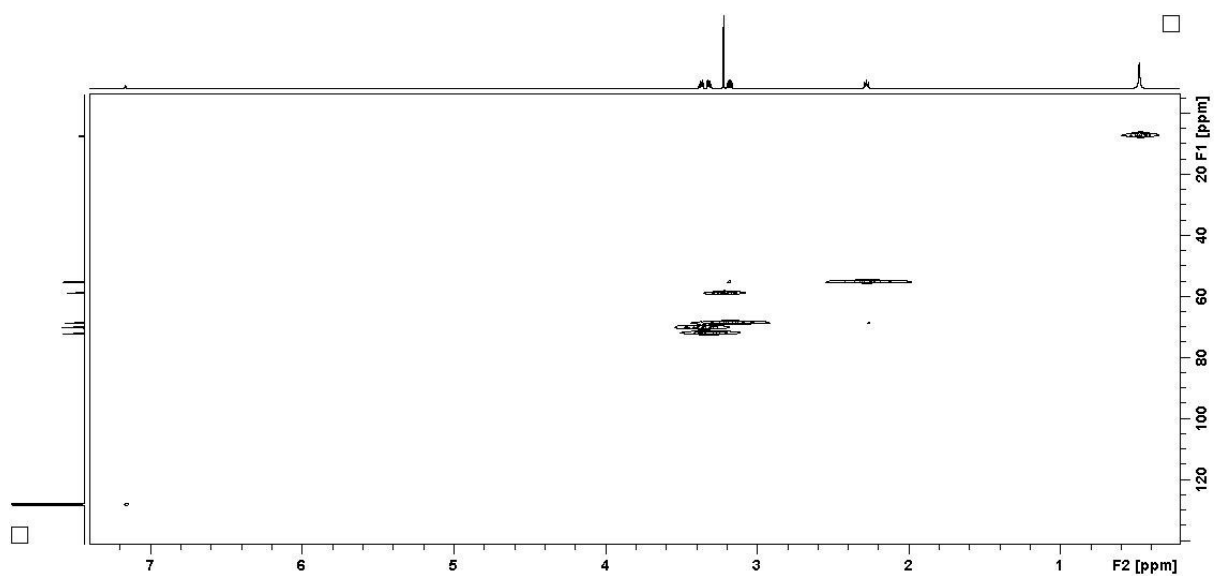

Figure S25.  $^1\text{H},^{13}\text{C}$ -HSQC  $^1\text{H}$  NMR (400.1 MHz,  $\text{C}_6\text{D}_6$ , 300 K) of isolated crystals of **11**.

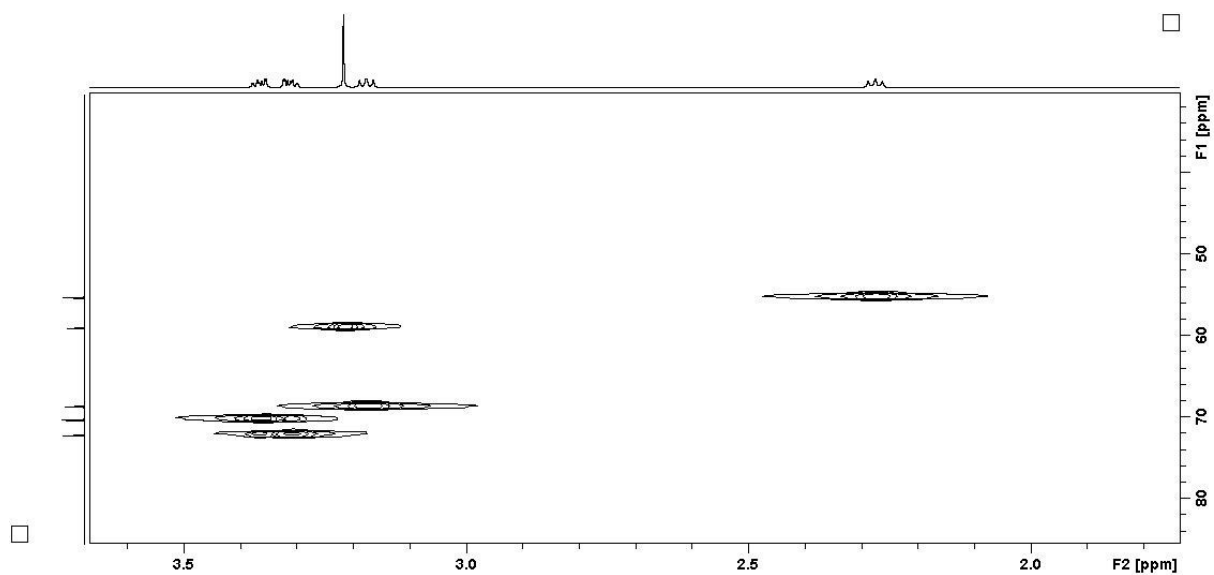

Figure S26.  $^1\text{H},^{13}\text{C}$ -HSQC NMR (400.1 MHz,  $\text{C}_6\text{D}_6$ , 300 K) of isolated crystals of **11**.

## Solution $^1\text{H}$ DOSY NMR Studies

### NMR Spectroscopic Analysis Details

The Diffusion-Ordered Spectroscopy (DOSY) NMR experiments were performed on a Bruker AVANCE 400 MHz NMR spectrometer at 300 K operating at 400.1 MHz for  $^1\text{H}$  under TopSpin (version 2.0, Bruker Biospin, Karlsruhe) and equipped with a BBFO-z-atm probe with actively shielded z-gradient coil capable of delivering a maximum gradient strength of  $54 \text{ G cm}^{-1}$ . Diffusion-ordered NMR data were acquired using the Bruker pulse program *dstepp3s* with a double stimulated echo with three spoiling gradients. Sine-shaped gradient pulses were used with a duration of 4 ms together with a diffusion period of 100 ms. Gradient recovery delays of 200  $\mu\text{s}$  followed the application of each gradient pulse. Data were systematically accumulated by linearly varying the diffusion encoding gradients over a range from 2% to 95% of maximum for 64 gradient increment values. The signal decay dimension on the *pseudo*-2D data was generated by Fourier transformation of the time-domain data. DOSY plots were generated by use of the DOSY processing module of TopSpin. Parameters were optimized empirically to find the best quality of data for presentation purposes.

### DOSY NMR Samples Preparation

To an NMR tube containing the corresponding compound to be analysed (typically, 20 mg) dissolved in the appropriate deuterated solvent ( $\text{C}_6\text{D}_6$ ,  $\text{D}_8$ -toluene or  $\text{D}_8$ -THF, 0.5 mL) was added inert internal standards 1,2,3,4-tetraphenyl-naphthalene (TPhN, 15 mg), 1-phenyl-naphthalene (PhN, 13.2  $\mu\text{L}$ ) and tetramethylsilane (TMS, 19.1  $\mu\text{L}$ ).

$^1\text{H}$  DOSY NMR spectroscopic study of **1** in  $\text{C}_6\text{D}_6$  solution

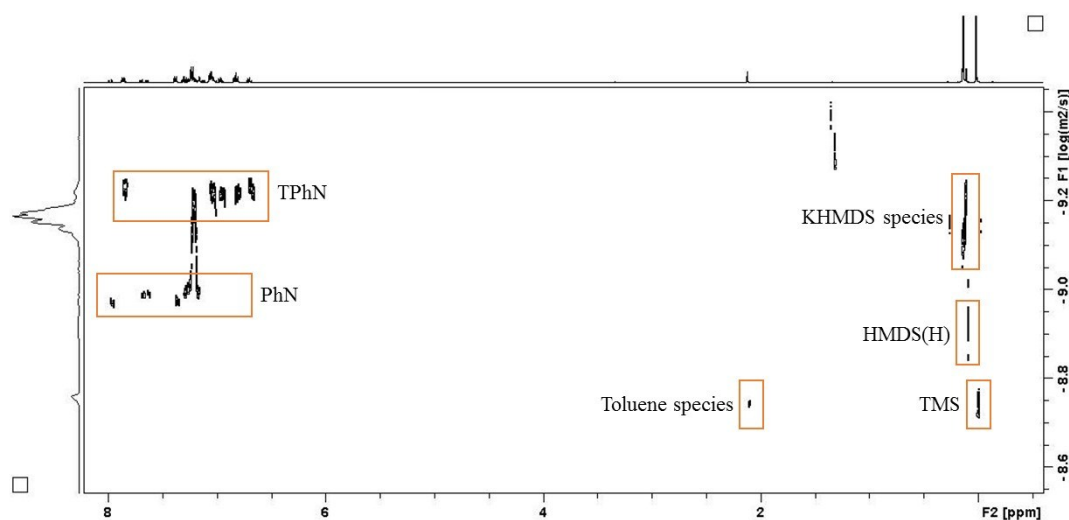

**Figure S27.**  $^1\text{H}$  DOSY NMR of **1** in  $\text{C}_6\text{D}_6$  at 300 K.

**Table S3.** Diffusion coefficients for the internal references (TPhN, PhN and TMS) and for the species present in a solution of **1** in  $\text{C}_6\text{D}_6$ .

| Internal standards; $R^2 = 0.997$ |                               |                               | Species in solution           |                               |
|-----------------------------------|-------------------------------|-------------------------------|-------------------------------|-------------------------------|
| TPhN                              | PhN                           | TMS                           | KHMDs species                 | Toluene species               |
| $D / \text{m}^2\text{s}^{-1}$     | $D / \text{m}^2\text{s}^{-1}$ | $D / \text{m}^2\text{s}^{-1}$ | $D / \text{m}^2\text{s}^{-1}$ | $D / \text{m}^2\text{s}^{-1}$ |
| $5.97 \times 10^{-10}$            | $1.04 \times 10^{-9}$         | $1.74 \times 10^{-9}$         | $6.77 \times 10^{-10}$        | $1.80 \times 10^{-9}$         |

**Table S4.**  $\text{MW}_{\text{DOSY}}$  for species found in a solution of **1** in  $\text{C}_6\text{D}_6$ .

| Species in solution | $D (\text{m}^2\text{s}^{-1})$ | $\text{MW}_{\text{DOSY}} (\text{g mol}^{-1})$ |
|---------------------|-------------------------------|-----------------------------------------------|
| KHMDs species       | $6.77 \times 10^{-10}$        | 365.99                                        |
| Toluene species     | $1.80 \times 10^{-9}$         | 85.84                                         |

**Comments on the  $^1\text{H}$  DOSY NMR spectrum of **1** in  $\text{C}_6\text{D}_6$  solution:** Two different diffusion coefficients are observed for the two parts conforming the solid state of **1** (HMDS vs toluene ligand, Figure S27). This suggests a different species in  $\text{C}_6\text{D}_6$  solution to that found in the solid state, as toluene seems to not coordinate to the potassium centre in bulk  $\text{C}_6\text{D}_6$ . The  $\text{MW}_{\text{DOSY}}$  obtained for the HMDS species ( $\text{MW} = 365.99 \text{ g/mol}$ , Table S3 and S4) is in agreement with monomerisation of **1** to form the species  $[(\text{KHMDs})(\text{C}_6\text{D}_6)_2]$  ( $\text{MW} = 365.77 \text{ g/mol}$ ) in  $\text{C}_6\text{D}_6$  solution. The diffusion coefficient obtained for

toluene is close to the theoretical value of free toluene ( $MW_{\text{DOSY}} = 85.84 \text{ g/mol}$ ,  $MW_{\text{THEO}} = 92.15 \text{ g/mol}$ ). The conclusion obtained from the  $^1\text{H}$  DOSY NMR spectroscopic experiment of **1** confirms that the dimeric structure present in solid state does not remain in  $\text{C}_6\text{D}_6$  solution.

$^1\text{H}$  DOSY NMR spectroscopic study of **3** in  $\text{C}_6\text{D}_6$  solution

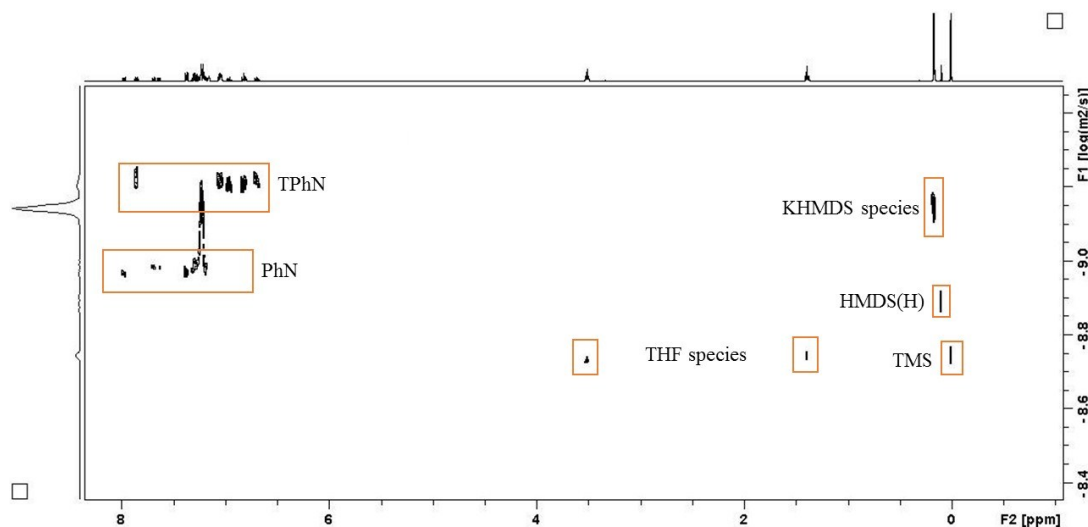

**Figure S28.**  $^1\text{H}$  DOSY NMR of **3** in  $\text{C}_6\text{D}_6$  at 300 K.

**Table S5.** Diffusion coefficients for the internal references (TPhN, PhN and TMS) and for the species present in a solution of **3** in  $\text{C}_6\text{D}_6$ .

| Internal standards; $R^2 = 0.998$ |                               |                               | Species in solution           |                               |
|-----------------------------------|-------------------------------|-------------------------------|-------------------------------|-------------------------------|
| TPhN                              | PhN                           | TMS                           | KHMDS species                 | THF species                   |
| $D / \text{m}^2\text{s}^{-1}$     | $D / \text{m}^2\text{s}^{-1}$ | $D / \text{m}^2\text{s}^{-1}$ | $D / \text{m}^2\text{s}^{-1}$ | $D / \text{m}^2\text{s}^{-1}$ |
| $6.16 \times 10^{-10}$            | $1.07 \times 10^{-9}$         | $1.80 \times 10^{-9}$         | $7.18 \times 10^{-10}$        | $1.85 \times 10^{-9}$         |

**Table S6.**  $MW_{\text{DOSY}}$  for species found in a solution of **3** in  $\text{C}_6\text{D}_6$ .

| Species in solution | $D (\text{m}^2\text{s}^{-1})$ | $MW_{\text{DOSY}} (\text{gmol}^{-1})$ |
|---------------------|-------------------------------|---------------------------------------|
| KHMDS species       | $7.18 \times 10^{-10}$        | 352.13                                |
| THF species         | $1.85 \times 10^{-9}$         | 87.16                                 |

**Comments on the  $^1\text{H}$  DOSY NMR spectrum of **3** in  $\text{C}_6\text{D}_6$  solution:** The solid state structure of **3** does not remain intact in  $\text{C}_6\text{D}_6$  solution, as the THF and the HMDS containing species appear to have different diffusion coefficients, thus indicating that different species are found in solution. The experimental  $\text{MW}_{\text{DOSY}}$  obtained for the HMDS component is 352.13 g/mol, similar to that of **1** in  $\text{C}_6\text{D}_6$ , suggesting that a similar process might be happening for **3** in  $\text{C}_6\text{D}_6$  solution (see Figure S28, Table S5 and S6). This could be explained by a dynamic exchange and competition between THF and  $\text{C}_6\text{D}_6$  molecules to coordinate KHMDS. For THF, the observed  $\text{MW}_{\text{DOSY}}$  is 87.16 g/mol which is higher than the theoretical  $\text{MW}_{\text{THEO}}$  of THF (72.11 g/mol), this been in agreement as well with a competition with  $\text{C}_6\text{D}_6$  molecules for solvation of the potassium centre. The species found in solution could be an equilibria between a monomeric  $[(\text{KHMDS})(\text{C}_6\text{D}_6)_2]$  ( $\text{MW} = 365.77$  g/mol) and monomeric  $[(\text{KHMDS})(\text{THF})_2]$  ( $\text{MW} = 357.78$  g/mol).

$^1\text{H}$  DOSY NMR spectroscopic study of **3** in  $\text{D}_8$ -THF solution

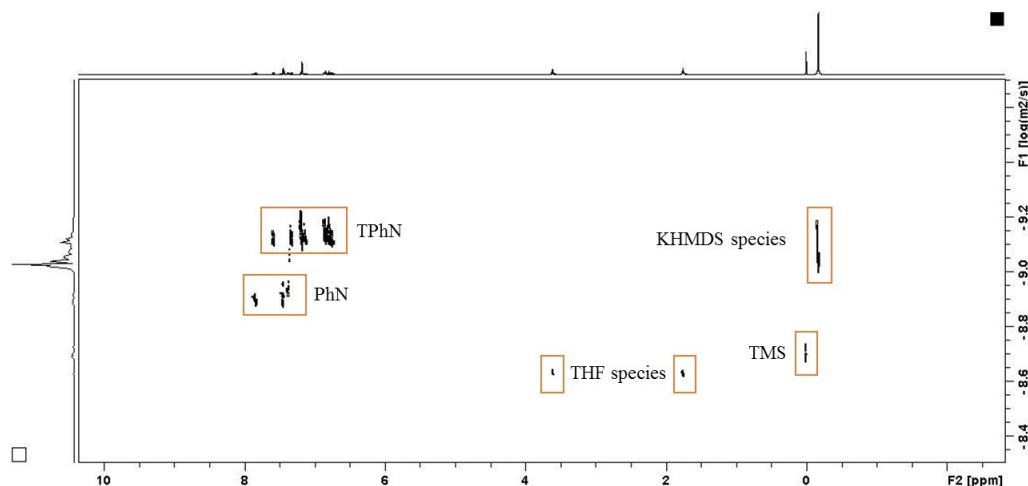

**Figure S29.**  $^1\text{H}$  DOSY NMR of **3** in  $\text{D}_8$ -THF at 300 K.

**Table S7.** Diffusion coefficients for the internal references (TPhN, PhN and TMS) and for the species present in a solution of **3** in  $\text{D}_8$ -THF.

| Internal standards; $R^2 = 0.995$ |                               |                               | Species in solution           |                               |
|-----------------------------------|-------------------------------|-------------------------------|-------------------------------|-------------------------------|
| TPhN                              | PhN                           | TMS                           | KHMDS species                 | THF species                   |
| $D / \text{m}^2\text{s}^{-1}$     | $D / \text{m}^2\text{s}^{-1}$ | $D / \text{m}^2\text{s}^{-1}$ | $D / \text{m}^2\text{s}^{-1}$ | $D / \text{m}^2\text{s}^{-1}$ |
| $7.54 \times 10^{-10}$            | $1.27 \times 10^{-9}$         | $2.00 \times 10^{-9}$         | $9.29 \times 10^{-10}$        | $2.32 \times 10^{-9}$         |

**Table S8.**  $MW_{\text{DOSY}}$  for species found in a solution of **3** in  $D_8$ -THF.

| Species in solution | D ( $\text{m}^2\text{s}^{-1}$ ) | $MW_{\text{DOSY}}$ ( $\text{g}\text{mol}^{-1}$ ) |
|---------------------|---------------------------------|--------------------------------------------------|
| KHMDS species       | $9.29 \times 10^{-10}$          | 317.65                                           |
| THF species         | $2.32 \times 10^{-9}$           | 71.43                                            |

**Comments on the  $^1\text{H}$  DOSY NMR spectrum of **3** in  $\text{C}_6\text{D}_6$  solution:** Two diffusion coefficients are obtained for the ligands building **3** (Figure S29). The bulk  $D_8$ -THF solvent displaces THF for solvation to KHMDS, being the experimental  $MW_{\text{DOSY}}$  of THF ( $MW = 71.4 \text{ g/mol}$ ) the same for the theoretical value ( $MW_{\text{THEO}}$  of free THF =  $72.1 \text{ g/mol}$ ). Experimental  $MW_{\text{DOSY}}$  is  $317.7 \text{ g/mol}$  for the HMDS component, this being in agreement with monomerisation of the alkali metal amide in  $D_8$ -THF solution. The theoretical  $MW_{\text{THEO}}$  of  $[\text{KHMDS}(D_8\text{-THF})_2]$  is  $357.8 \text{ g/mol}$ , these species being quite close to the obtained  $MW_{\text{DOSY}}$  ( $317.7$ , 8% error) (Table S7 and S8). This result shows that, not only the interactions established between  $[(\text{KHMDS})_2(\text{THF})_2]$  fragments are broken as expected, but the dimeric entity of  $[\text{KHMDS}]_2$  found in solid state does not remain in solution, but a monomeric species of solvated KHMDS.

$^1\text{H}$  DOSY NMR spectroscopic study of **4** in  $\text{C}_6\text{D}_6$  solution

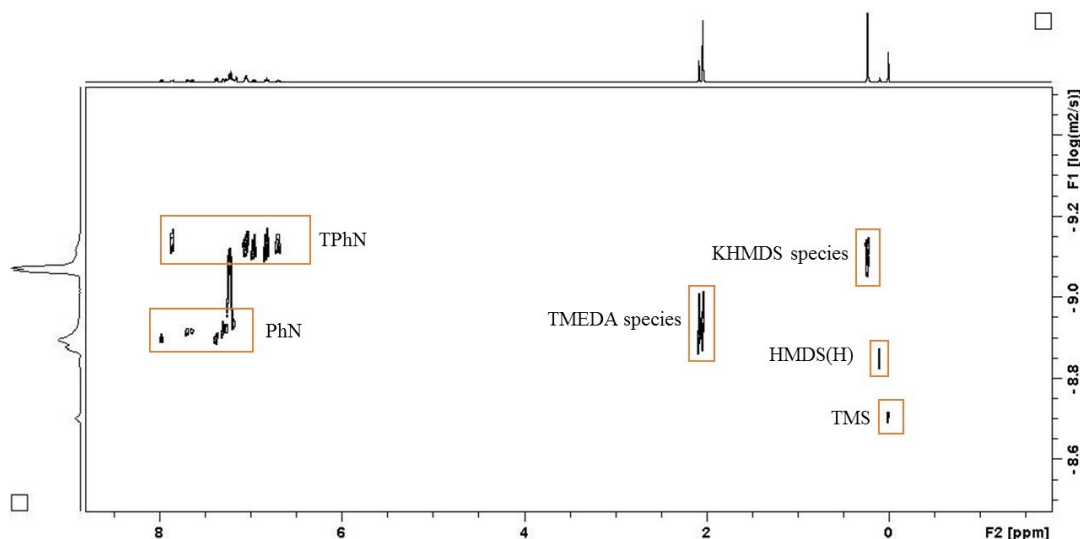

**Figure S30.**  $^1\text{H}$  DOSY NMR of **4** in  $\text{C}_6\text{D}_6$  at 300 K.



**Table S9.** Diffusion coefficients for the internal references (TPhN, PhN and TMS) and for the species present in a solution of **4** in C<sub>6</sub>D<sub>6</sub>.

| Internal standards; R <sup>2</sup> = 0.998 |                                    |                                    | Species in solution                |                                    |
|--------------------------------------------|------------------------------------|------------------------------------|------------------------------------|------------------------------------|
| TPhN                                       | PhN                                | TMS                                | KHMDS species                      | TMEDA species                      |
| D / m <sup>2</sup> s <sup>-1</sup>         | D / m <sup>2</sup> s <sup>-1</sup> | D / m <sup>2</sup> s <sup>-1</sup> | D / m <sup>2</sup> s <sup>-1</sup> | D / m <sup>2</sup> s <sup>-1</sup> |
| 7.66 x 10 <sup>-10</sup>                   | 1.25 x 10 <sup>-9</sup>            | 1.98 x 10 <sup>-9</sup>            | 8.47 x 10 <sup>-10</sup>           | 1.29 x 10 <sup>-9</sup>            |

**Table S10.** MW<sub>DOSY</sub> for species found in a solution of **4** in C<sub>6</sub>D<sub>6</sub>.

| Species in solution | D (m <sup>2</sup> s <sup>-1</sup> ) | MW <sub>DOSY</sub> (gmol <sup>-1</sup> ) |
|---------------------|-------------------------------------|------------------------------------------|
| KHMDS species       | 8.47 x 10 <sup>-10</sup>            | 373.19                                   |
| TMEDA species       | 1.29 x 10 <sup>-9</sup>             | 183.87                                   |

**Comments on the <sup>1</sup>H DOSY NMR spectrum of **4** in C<sub>6</sub>D<sub>6</sub> solution:** According to the information detailed in Figure S30, Table S9 and S10, the KHMDS species found in C<sub>6</sub>D<sub>6</sub> has a lower molecular weight (experimental MW<sub>DOSY</sub> is 373.0 g/mol for HMDS signal) compared to the theoretical value of **4** [(TMEDA)<sub>2</sub>(KHMDS)<sub>2</sub>] 631.39 g/mol]. Thus, the experimental value obtained for the HMDS ligand is closer to a coordinated monomeric species of the type [(KHMDS)(C<sub>6</sub>D<sub>6</sub>)<sub>2</sub>] (MW = 365.77 g/mol) than to a dimeric species of the type [(KHMDS)<sub>2</sub>(donor)<sub>2</sub>] (donor = TMEDA or C<sub>6</sub>D<sub>6</sub>; MW = 631.39 or 565.26 g/mol). This experiment appears to suggest monomeric C<sub>6</sub>D<sub>6</sub> solvates of KHMDS in solution as major species over dimeric aggregates. Regarding the experimental MW<sub>DOSY</sub> for the TMEDA species, it is slightly higher (183.87 g/mol) than the theoretical value of TMEDA (116.21 g/mol). This situation suggests coordination of the bidentate ligand (TMEDA) to the complex, competing with molecules of solvent (C<sub>6</sub>D<sub>6</sub>) for coordinating to the potassium centre in solution. The <sup>1</sup>H NMR of **4** in C<sub>6</sub>D<sub>6</sub> (Figure Sx) shows coordination of the ligand to KHMDS as the chemical shift values for the bidentate ligand are different to those found for uncoordinated TMEDA. However, when TMEDA coordinates to an alkali metal normally the signals observed show the Me groups at lower fields than the -CH<sub>2</sub>- of the backbone. The inverse disposition of the signals within a solution of **4** in arene solvent, is in concordance with at least a partial de-coordination of the Lewis base ligand from the potassium centre. The same behaviour was observed for **5**, as the solid state structures of **4** and **5** are similar, the only difference being the type of bidentate ligand.

<sup>1</sup>H DOSY NMR spectroscopic study of **4** in D<sub>8</sub>-THF solution

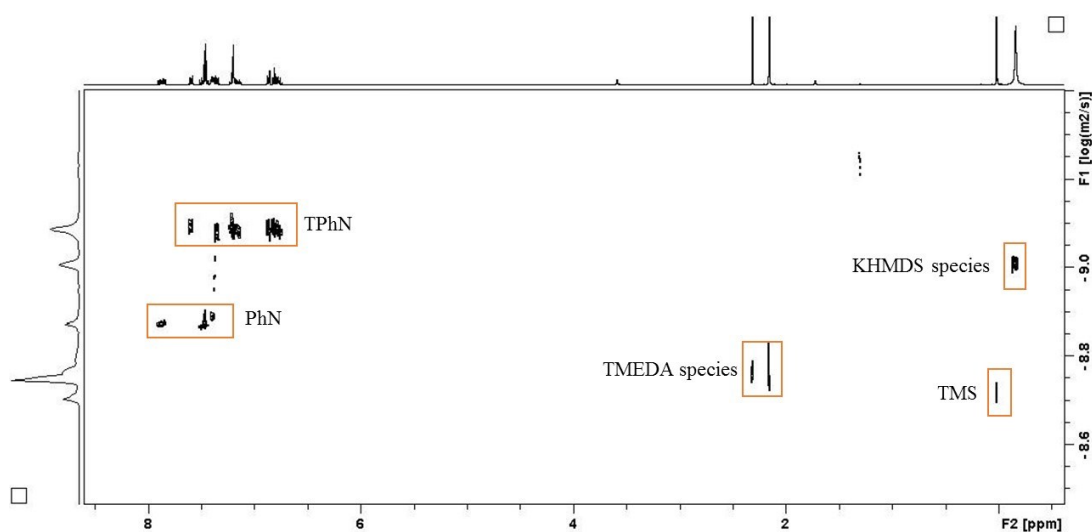

**Figure S31.** <sup>1</sup>H DOSY NMR of **4** in D<sub>8</sub>-THF at 300 K.

**Table S11.** Diffusion coefficients for the internal references (TPhN, PhN and TMS) and for the species present in a solution of **4** in D<sub>8</sub>-THF.

| Internal standards; R <sup>2</sup> = 0.987 |                                    |                                    | Species in solution                |                                    |
|--------------------------------------------|------------------------------------|------------------------------------|------------------------------------|------------------------------------|
| TPhN                                       | PhN                                | TMS                                | KHMDS species                      | TMEDA species                      |
| D / m <sup>2</sup> s <sup>-1</sup>         | D / m <sup>2</sup> s <sup>-1</sup> | D / m <sup>2</sup> s <sup>-1</sup> | D / m <sup>2</sup> s <sup>-1</sup> | D / m <sup>2</sup> s <sup>-1</sup> |
| 8.18 x 10 <sup>-10</sup>                   | 1.35 x 10 <sup>-9</sup>            | 1.97 x 10 <sup>-9</sup>            | 9.80 x 10 <sup>-10</sup>           | 1.77 x 10 <sup>-9</sup>            |

**Table S12.** MW<sub>DOSY</sub> for species found in a solution of **4** in D<sub>8</sub>-THF.

| Species in solution | D (m <sup>2</sup> s <sup>-1</sup> ) | MW <sub>DOSY</sub> (gmol <sup>-1</sup> ) |
|---------------------|-------------------------------------|------------------------------------------|
| KHMDS species       | 7.91 x 10 <sup>-10</sup>            | 329.25                                   |
| TMEDA               | 7.37 x 10 <sup>-9</sup>             | 112.79                                   |

**Comments on the <sup>1</sup>H DOSY NMR spectrum of **4** in D<sub>8</sub>-THF solution:** The species found in a solution of **4** in D<sub>8</sub>-THF (Figure S31) is in agreement with a monomeric species of the type [KHMDS·(D<sub>8</sub>-THF)<sub>n</sub>] (n = 2 MW 343.47 g/mol; n = 3 MW 415.81 g/mol) and free ligand, MW<sub>DOSY</sub> of TMEDA is 116.22 g/mol, see Table S11 and Table S12.

### $^1\text{H}$ DOSY NMR spectroscopic study of **6** in $\text{D}_8$ -toluene solution

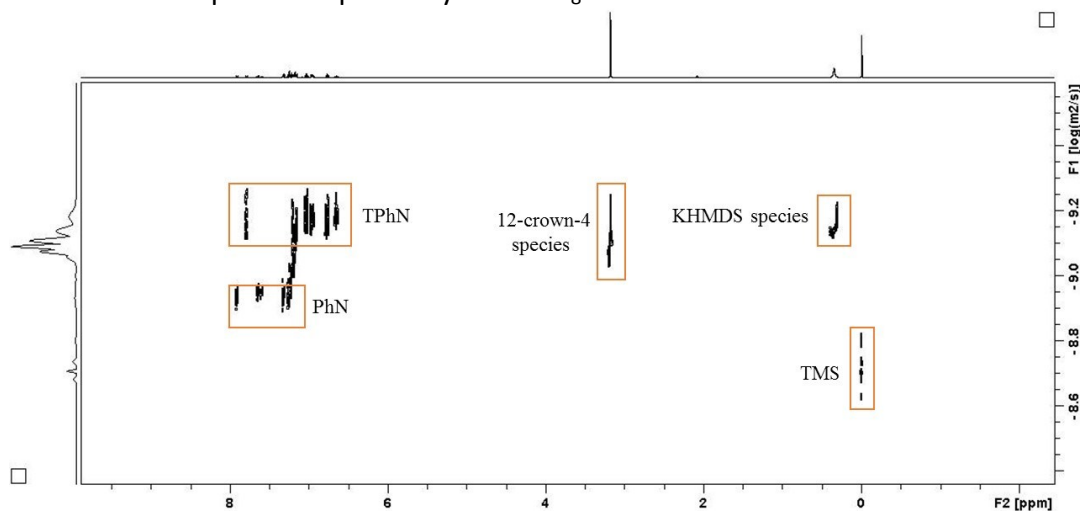

**Figure S32.**  $^1\text{H}$  DOSY NMR of **6** in  $\text{D}_8$ -toluene at 300 K.

**Table S13.** Diffusion coefficients for the internal references (TPhN, PhN and TMS) and for the species present in a solution of **6** in  $\text{D}_8$ -Toluene.

| Internal standards; $R^2 = 0.998$ |                               |                               | Species in solution           |                               |
|-----------------------------------|-------------------------------|-------------------------------|-------------------------------|-------------------------------|
| TPhN                              | PhN                           | TMS                           | KHMDS species                 | 12-crown-4 species            |
| $D / \text{m}^2\text{s}^{-1}$     | $D / \text{m}^2\text{s}^{-1}$ | $D / \text{m}^2\text{s}^{-1}$ | $D / \text{m}^2\text{s}^{-1}$ | $D / \text{m}^2\text{s}^{-1}$ |
| $6.72 \times 10^{-10}$            | $1.13 \times 10^{-9}$         | $1.92 \times 10^{-9}$         | $7.91 \times 10^{-9}$         | $7.37 \times 10^{-9}$         |

**Table S14.**  $\text{MW}_{\text{DOSY}}$  for species found in a solution of **6** in  $\text{D}_8$ -Toluene.

| Species in solution | $D (\text{m}^2\text{s}^{-1})$ | $\text{MW}_{\text{DOSY}} (\text{g mol}^{-1})$ |
|---------------------|-------------------------------|-----------------------------------------------|
| KHMDS species       | $7.91 \times 10^{-9}$         | 360.59                                        |
| 12-crown-4 species  | $7.37 \times 10^{-9}$         |                                               |

**Comments on the  $^1\text{H}$  DOSY NMR spectrum of **6** in  $\text{D}_8$ -toluene solution:**  $^1\text{H}$  DOSY NMR study (see Figure S32, Table S13 and S14) suggests a monomeric species of **6** in  $\text{d}_8$ -toluene solution of the type [KHMDS(12-crown-4)]. The dimeric species found in solid state does not remain in coordinating hydrocarbon solution, thus a co-complexation should have taken place between two monomeric [KHMDS(12-crown-4)] species to isolate **6** in the solid state. In contrast with **4**, molecules of solvent do not appear to coordinate the potassium centre as the tetra oxygen ligand appears to be a

stronger competitor to coordinate KHMDS. In this sense, the  $MW_{\text{DOSY}}$  obtained for the 12-crown-4 species is quite far from the one the free ligand ( $MW_{\text{DOSY}}$  of 12-crown-4 in **6** is 380.68 g/mol;  $MW_{\text{THEO}}$  of uncoordinated 12-crown-4 is 176.21 g/mol). Although the affinity of heavy alkali metals to interact with coordinating hydrocarbon solvents through a  $\pi$ -interaction, the four K–O interactions between the potassium centre and the oxygen atoms of the tetradentate ligand seem to be chosen over a  $\pi$ -interaction with molecules of  $D_8$ -toluene.

### $^1\text{H}$ DOSY NMR spectroscopic study of **6** in $D_8$ -THF solution

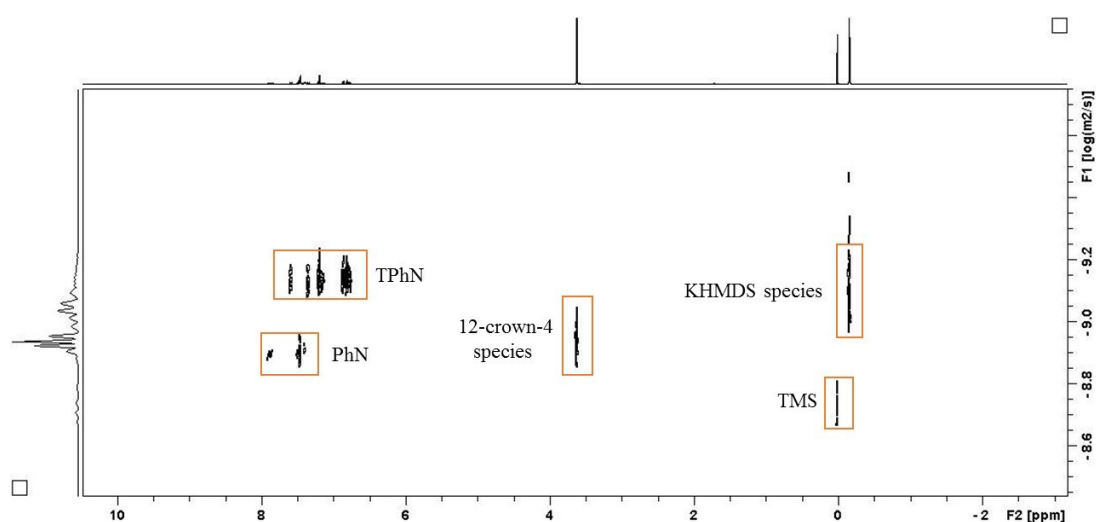

**Figure S33.**  $^1\text{H}$  DOSY NMR of **6** in  $D_8$ -THF at 300 K.

**Table S15.** Diffusion coefficients for the internal references (TPhN, PhN and TMS) and for the species present in a solution of **6** in  $D_8$ -THF.

| Internal standards; $R^2 = 0.987$ |                               |                               | Species in solution           |                               |
|-----------------------------------|-------------------------------|-------------------------------|-------------------------------|-------------------------------|
| TPhN                              | PhN                           | TMS                           | KHMDS species                 | 12-crown-4 species            |
| $D / \text{m}^2\text{s}^{-1}$     | $D / \text{m}^2\text{s}^{-1}$ | $D / \text{m}^2\text{s}^{-1}$ | $D / \text{m}^2\text{s}^{-1}$ | $D / \text{m}^2\text{s}^{-1}$ |
| $7.26 \times 10^{-10}$            | $1.27 \times 10^{-9}$         | $1.86 \times 10^{-9}$         | $8.79 \times 10^{-10}$        | $1.15 \times 10^{-9}$         |

**Table S16.**  $MW_{\text{DOSY}}$  for species found in a solution of **6** in  $D_8$ -THF.

| Species in solution | D ( $m^2s^{-1}$ )      | $MW_{\text{DOSY}}$<br>( $gmol^{-1}$ ) |
|---------------------|------------------------|---------------------------------------|
| KHMDS species       | $8.79 \times 10^{-10}$ | 334.28                                |
| 12-crown-4 species  | $1.15 \times 10^{-9}$  | 211.06                                |

**Comments on the  $^1H$  DOSY NMR spectrum of **6** in  $D_8$ -THF solution:** According to  $^1H$  DOSY NMR spectroscopic study (Figure S33 and Table S15 and S16) of **6** in  $D_8$ -THF, it suggests the structure found in solid state does not remain in solution, but the monomeric species [KHMDS·(12-crown-4)], it can be envisaged that the more coordinating polar solvent  $D_8$ -THF compared with  $D_8$ -toluene, will monomerise **6** as well. Looking at the HMDS signal, the observed  $MW_{\text{DOSY}}$  (334.28 g/mol) suggests monomerisation of KHMDS. This  $MW_{\text{DOSY}}$  is 11% lower than the theoretical  $MW_{\text{THEO}}$  for [KHMDS·(12-crown-4)] ( $MW$  375.17 g/mol) due to a competition of the ligand and molecules of solvent to be coordinated and free.  $MW_{\text{DOSY}}$  for the ligand (12-crown-4 ether) is higher than the theoretical value for the free ligand ( $MW_{\text{THEO}}$  of 12-crown-4 is 176.21 g/mol), this indicating as well an equilibria between free ligand and coordinated ligand increasing the  $MW$  of the donor.

$^1H$  DOSY NMR spectroscopic study of **8** in  $C_6D_6$  solution

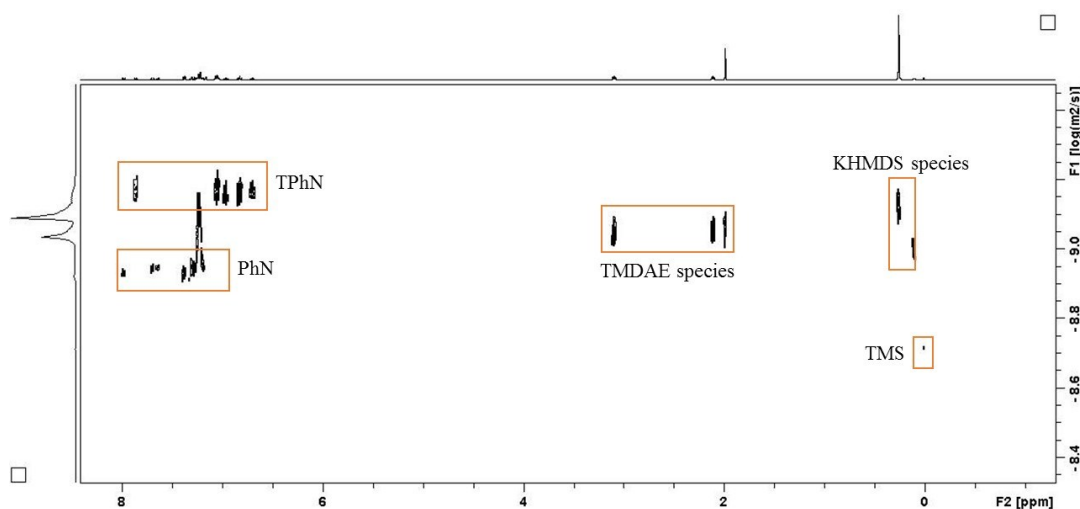

**Figure S34.**  $^1H$  DOSY NMR of **8** in  $C_6D_6$  at 300 K.

**Table S17.** Diffusion coefficients for the internal references (TPhN, PhN and TMS) and for the species present in a solution of **8** in C<sub>6</sub>D<sub>6</sub>.

| Internal standards; R <sup>2</sup> = 0.999 |                                    |                                    | Species in solution                |                                    |
|--------------------------------------------|------------------------------------|------------------------------------|------------------------------------|------------------------------------|
| TPhN                                       | PhN                                | TMS                                | KHMDS species                      | TMDAE species                      |
| D / m <sup>2</sup> s <sup>-1</sup>         | D / m <sup>2</sup> s <sup>-1</sup> | D / m <sup>2</sup> s <sup>-1</sup> | D / m <sup>2</sup> s <sup>-1</sup> | D / m <sup>2</sup> s <sup>-1</sup> |
| 7.09 x 10 <sup>-10</sup>                   | 1.16 x 10 <sup>-9</sup>            | 1.94 x 10 <sup>-9</sup>            | 8.09 x 10 <sup>-10</sup>           | 1.00 x 10 <sup>-9</sup>            |

**Table S18.** MW<sub>DOSY</sub> for species found in a solution of **8** in C<sub>6</sub>D<sub>6</sub>.

| Species in solution | D (m <sup>2</sup> s <sup>-1</sup> ) | MW <sub>DOSY</sub> (gmol <sup>-1</sup> ) |
|---------------------|-------------------------------------|------------------------------------------|
| KHMDS species       | 8.09 x 10 <sup>-10</sup>            | 353.96                                   |
| TMDAE species       | 1.00 x 10 <sup>-9</sup>             | 252.99                                   |

**Comments on the <sup>1</sup>H DOSY NMR spectrum of **8** in C<sub>6</sub>D<sub>6</sub> solution:** The solid state aggregation of **8** is not maintained in C<sub>6</sub>D<sub>6</sub> solvent as two species with different diffusion coefficients appear in the <sup>1</sup>H DOSY spectroscopic study (Figure S34, Table S17-S18). The obtained MW<sub>DOSY</sub> for the HMDS ligand (353.96 g/mol) suggests monomerisation of the alkali metal amide species to [(KHMDS)(C<sub>6</sub>D<sub>6</sub>)<sub>2</sub>] (MW: 365.77 g/mol). According to <sup>1</sup>H DOSY, the experimental MW<sub>DOSY</sub> for the TMDAE species is 252.99 g/mol, whilst the free TMDAE ligand expected would have a MW<sub>THEO</sub> of 160.26 g/mol. This result suggests at least partial coordination of TMDAE to the potassium centre in solution, competing with molecules of solvent (C<sub>6</sub>D<sub>6</sub>) to coordinate the metallic centre.

$^1\text{H}$  DOSY NMR spectroscopic study of **8** in  $\text{C}_6\text{D}_6$  solution

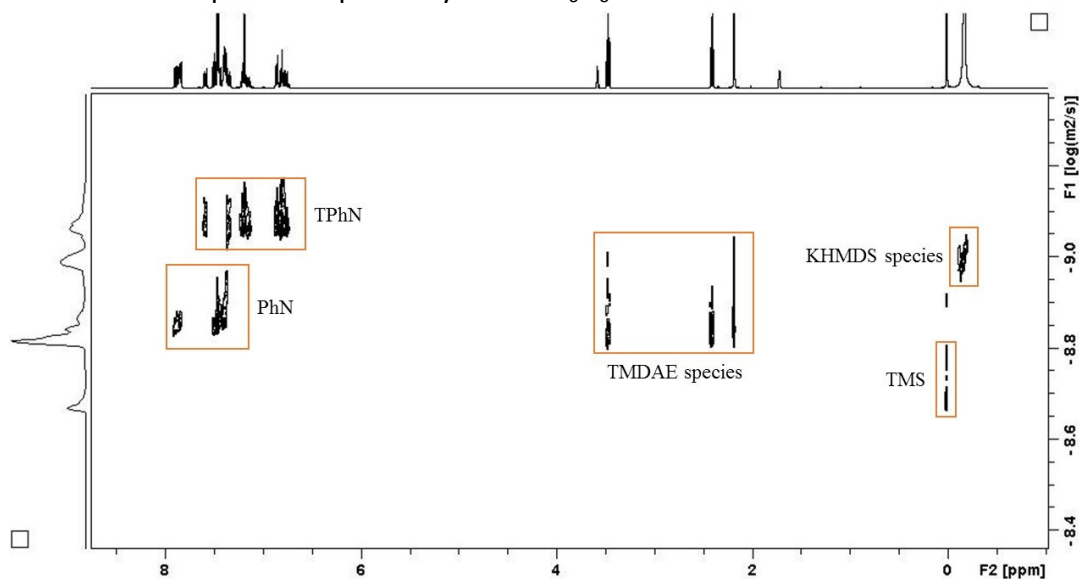

**Figure S35.**  $^1\text{H}$  DOSY NMR of **8** in  $\text{D}_8\text{-THF}$  at 300 K.

**Table S19.** Diffusion coefficients for the internal references (TPhN, PhN and TMS) and for the species present in a solution of **8** in  $\text{D}_8\text{-THF}$ .

| Internal standards; $R^2 = 0.999$ |                               |                               | Species in solution           |                               |
|-----------------------------------|-------------------------------|-------------------------------|-------------------------------|-------------------------------|
| TPhN                              | PhN                           | TMS                           | KHMDS species                 | TMDAE species                 |
| $D / \text{m}^2\text{s}^{-1}$     | $D / \text{m}^2\text{s}^{-1}$ | $D / \text{m}^2\text{s}^{-1}$ | $D / \text{m}^2\text{s}^{-1}$ | $D / \text{m}^2\text{s}^{-1}$ |
| $8.35 \times 10^{-10}$            | $1.43 \times 10^{-9}$         | $2.12 \times 10^{-9}$         | $1.02 \times 10^{-9}$         | $1.56 \times 10^{-9}$         |

**Table S20.**  $\text{MW}_{\text{DOSY}}$  for species found in a solution of **8** in  $\text{D}_8\text{-THF}$ .

| Species in solution | $D (\text{m}^2\text{s}^{-1})$ | $\text{MW}_{\text{DOSY}} (\text{g mol}^{-1})$ |
|---------------------|-------------------------------|-----------------------------------------------|
| KHMDS species       | $1.02 \times 10^{-9}$         | 338.82                                        |
| TMDAE species       | $1.56 \times 10^{-9}$         | 160.28                                        |

**Comments on the  $^1\text{H}$  DOSY NMR spectrum of **8** in  $\text{D}_8\text{-THF}$  solution:** A  $^1\text{H}$  NMR DOSY NMR spectroscopic study of **8** in  $\text{D}_8\text{-THF}$  (Figure S35) was carried out. The diffusion coefficients observed in Table S19 and S20 are in agreement with a monomeric species of the type  $[\text{KHMDS} \cdot (\text{d}_8\text{-THF})_n]$  ( $n = 2$  MW 343.47 g/mol;  $n = 3$ , MW 415.81 g/mol) and free ligand ( $\text{MW}_{\text{THEO}}$  of free TMDAE is 160.26 g/mol).

<sup>1</sup>H DOSY NMR spectroscopic study of **10** in C<sub>6</sub>D<sub>6</sub> solution

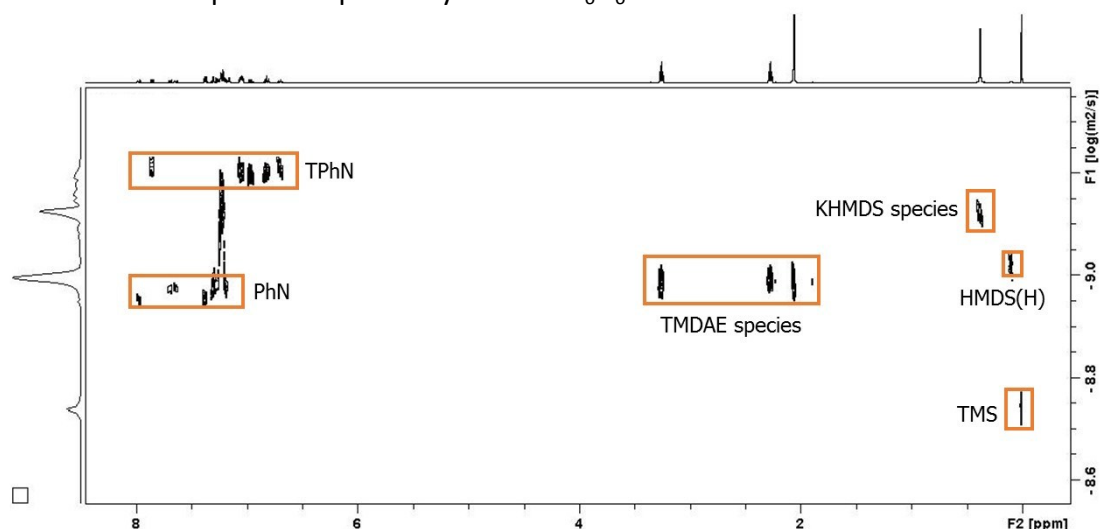

**Figure S36.** <sup>1</sup>H DOSY NMR of **10** in C<sub>6</sub>D<sub>6</sub> at 300 K.

**Table S21.** Diffusion coefficients for the internal references (TPhN, PhN and TMS) and for the species present in a solution of **10** in C<sub>6</sub>D<sub>6</sub>.

| Internal standards; R <sup>2</sup> = 0.999 |                                    |                                    | Species in solution                |                                    |
|--------------------------------------------|------------------------------------|------------------------------------|------------------------------------|------------------------------------|
| TPhN                                       | PhN                                | TMS                                | KHMDS species                      | TMDAE species                      |
| D / m <sup>2</sup> s <sup>-1</sup>         | D / m <sup>2</sup> s <sup>-1</sup> | D / m <sup>2</sup> s <sup>-1</sup> | D / m <sup>2</sup> s <sup>-1</sup> | D / m <sup>2</sup> s <sup>-1</sup> |
| 6.29 x 10 <sup>-10</sup>                   | 1.09 x 10 <sup>-9</sup>            | 1.83 x 10 <sup>-9</sup>            | 7.46 x 10 <sup>-10</sup>           | 1.00 x 10 <sup>-9</sup>            |

**Table S22.** MW<sub>DOSY</sub> for species found in a solution of **10** in C<sub>6</sub>D<sub>6</sub>.

| Species in solution | D (m <sup>2</sup> s <sup>-1</sup> ) | MW <sub>DOSY</sub> (gmol <sup>-1</sup> ) |
|---------------------|-------------------------------------|------------------------------------------|
| KHMDS species       | 7.46 x 10 <sup>-10</sup>            | 343.41                                   |
| TMDAE species       | 1.00 x 10 <sup>-9</sup>             | 221.43                                   |

**Comments on the <sup>1</sup>H DOSY NMR spectrum of **10** in C<sub>6</sub>D<sub>6</sub> solution:** A solution of **10** in C<sub>6</sub>D<sub>6</sub> was studied by <sup>1</sup>H DOSY NMR spectroscopy showing two different species in solution with diffusion coefficients of 7.46 x 10<sup>-10</sup> and 1.00 x 10<sup>-9</sup> (Figure S36). The MW<sub>DOSY</sub> of the HMDS species is 34% lower than the theoretical MW<sub>DOSY</sub> value of **10**, this suggesting as well that the identity of **10** is not maintained in C<sub>6</sub>D<sub>6</sub> solvent (theoretical MW<sub>DOSY</sub> of **10** is 520.01 g/mol). The observed MW<sub>DOSY</sub> for the TMDAE species is 221.43 g/mol, which is higher than the MW<sub>THEO</sub> of free TMDAE (160.26 g/mol). These results suggest at least partially coordination of the tridentate ligand to the metallic centre, and according to the value of the HMDS ligand, a competition of the tridentate ligand with



molecules of  $C_6D_6$  to coordinate the K metal centre, being an equilibria between free ligand and coordinated ligand increasing finally the MW of the TMDAE species (see Table S21 and S22).

$^1H$  DOSY NMR spectroscopic study of **10** in  $D_8$ -THF solution

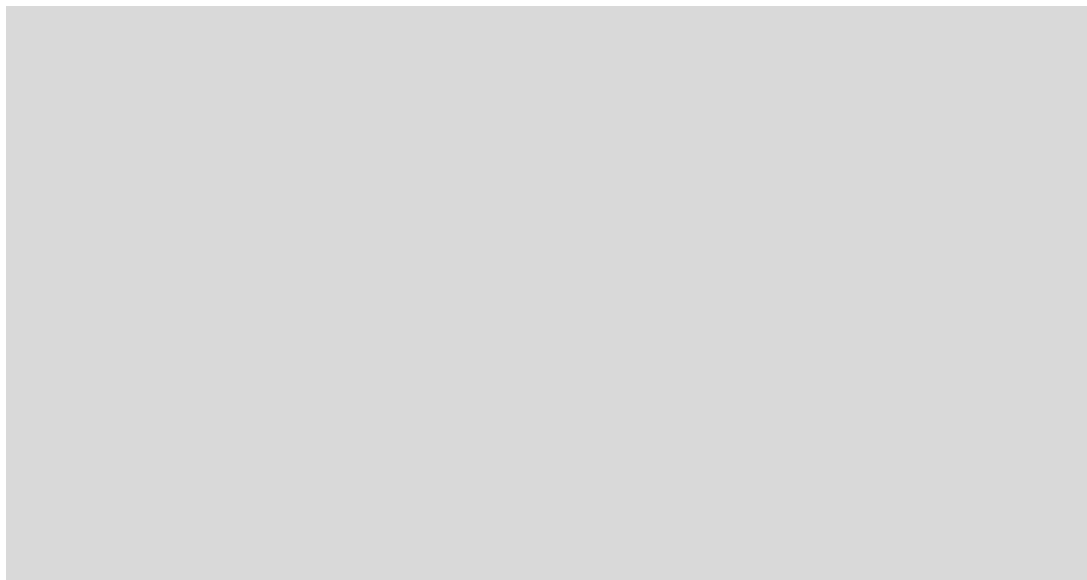

**Figure S37.**  $^1H$  DOSY NMR of **10** in  $D_8$ -THF at 300 K.

**Table S23.** Diffusion coefficients for the internal references (TPhN, PhN and TMS) and for the species present in a solution of **10** in  $D_8$ -THF.

| Internal standards; $R^2 = 0.999$ |                      |                       | Species in solution    |                       |
|-----------------------------------|----------------------|-----------------------|------------------------|-----------------------|
| TPhN                              | PhN                  | TMS                   | KHMDS species          | TMDAE species         |
| $D / m^2s^{-1}$                   | $D / m^2s^{-1}$      | $D / m^2s^{-1}$       | $D / m^2s^{-1}$        | $D / m^2s^{-1}$       |
| $7.52 \times 10^{-10}$            | $1.3 \times 10^{-9}$ | $1.96 \times 10^{-9}$ | $9.28 \times 10^{-10}$ | $1.41 \times 10^{-9}$ |

**Table S24.**  $MW_{DOSY}$  for species found in a solution of **10** in  $D_8$ -THF.

| Species in solution | $D (m^2s^{-1})$        | $MW_{DOSY}$<br>( $gmol^{-1}$ ) |
|---------------------|------------------------|--------------------------------|
| KHMDS species       | $9.28 \times 10^{-10}$ | 322.25                         |
| TMDAE species       | $1.41 \times 10^{-9}$  | 161.26                         |

**Comments on the  $^1\text{H}$  DOSY NMR spectrum of **10** in  $\text{D}_8\text{-THF}$  solution:** The  $^1\text{H}$  DOSY NMR spectroscopic study of **10** in  $\text{D}_8\text{-THF}$  (Figure S37) suggests a monomeric species in solution as the obtained  $\text{MW}_{\text{DOSY}}$  for the diffusion coefficient of the HMDS ligand is 322.25 g/mol, being in agreement with monomerisation of KHMSD solvated by  $d_8\text{-THF}$  molecules ( $[\text{KHMSD}(d_8\text{-THF})]_n$ , with  $n = 2$  the  $\text{MW}_{\text{THEO}}$  is 357.78).  $\text{MW}_{\text{DOSY}}$  for the TMDAE species is in agreement with the theoretical  $\text{MW}_{\text{THEO}}$  value of the corresponding free ligand. This suggests that the tridentate ligand is de-coordinated in  $\text{D}_8\text{-THF}$  solution, being molecules of solvent coordinating the alkali metal in solution at ambient temperature. Thus, according to the results obtained by  $^1\text{H}$  DOSY NMR, the structure found in solid state does not remain in  $\text{D}_8\text{-THF}$  solution (Table S23 and S24).

$^1\text{H}$  DOSY NMR spectroscopic study of **11** in  $\text{C}_6\text{D}_6$  solution

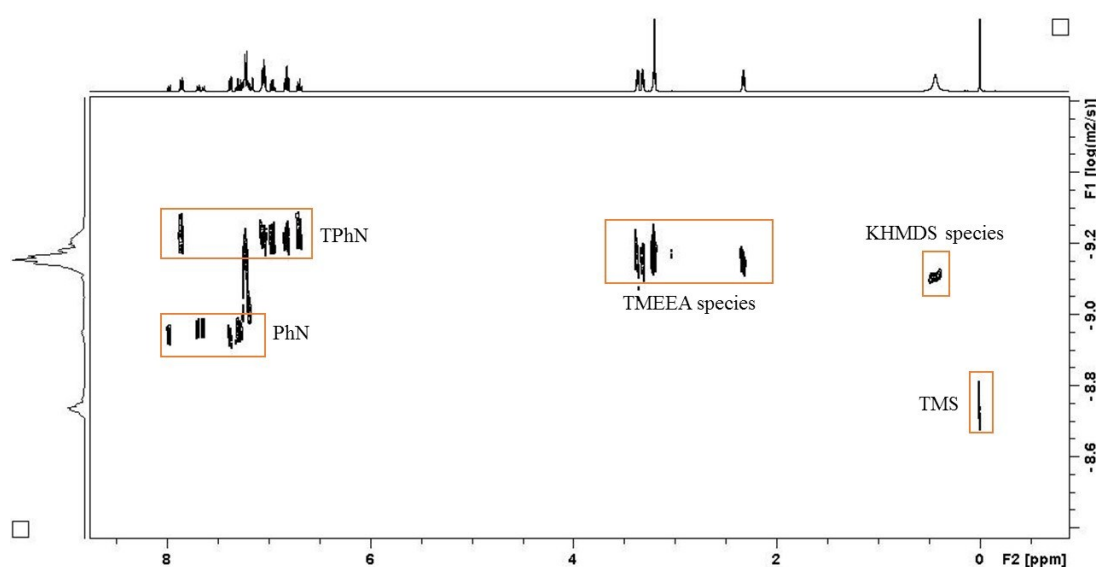

**Figure S38.**  $^1\text{H}$  DOSY NMR of **11** in  $\text{C}_6\text{D}_6$  at 300 K.

**Table S25.** Diffusion coefficients for the internal references (TPhN, PhN and TMS) and for the species present in a solution of **11** in  $\text{C}_6\text{D}_6$ .

| Internal standards; $R^2 = 0.999$ |                               |                               | Species in solution           |                               |
|-----------------------------------|-------------------------------|-------------------------------|-------------------------------|-------------------------------|
| TPhN                              | PhN                           | TMS                           | KHMSD species                 | TMEEA species                 |
| $D / \text{m}^2\text{s}^{-1}$     | $D / \text{m}^2\text{s}^{-1}$ | $D / \text{m}^2\text{s}^{-1}$ | $D / \text{m}^2\text{s}^{-1}$ | $D / \text{m}^2\text{s}^{-1}$ |
| $6.17 \times 10^{-10}$            | $1.08 \times 10^{-9}$         | $1.82 \times 10^{-9}$         | $7.81 \times 10^{-10}$        | $7.05 \times 10^{-10}$        |

**Table S26.**  $MW_{\text{DOSY}}$  for species found in a solution of **30** in  $C_6D_6$ .

| Species in solution | D ( $m^2s^{-1}$ )      | $MW_{\text{DOSY}}$ ( $gmol^{-1}$ ) |
|---------------------|------------------------|------------------------------------|
| KHMDS species       | $7.81 \times 10^{-10}$ | 314                                |
| TMEEA species       | $7.05 \times 10^{-10}$ | 365.71                             |

**Comments on the  $^1H$  DOSY NMR spectrum of **11** in  $C_6D_6$  solution:**  $^1H$  DOSY NMR spectroscopy shows two close but different diffusion coefficients for the HMDS and ligand parts of **11** in  $C_6D_6$  solution (Figure S38). The  $MW_{\text{DOSY}}$  obtained for the HMDS ligand (314.0 g/mol) suggests a monomeric species in solution coordinated by molecules of  $C_6D_6$  solvent, *i.e.*, the obtained  $MW_{\text{DOSY}}$  of 314.0 g/mol for the HMDS vs 523 g/mol (expected for  $[(\text{KHMDS})(\text{NO}_6\text{-ligand})]$ ) suggest monomerisation to  $[\text{KHMDS}(\text{arene})_n]$ ,  $[(\text{KHMDS})(C_6D_6)_2]$  of 367 g/mol (see Table S25 and S26). The  $MW_{\text{DOSY}}$  of the TMEEA ligand (365.71 g/mol) is 36% lower than the theoretical value for **11** (550.97 g/mol) due to competition in the coordination sphere of KHMDS by molecules of  $C_6D_6$  and the ligand, existing an equilibria between **11** and  $[\text{KHMDS}(C_6D_6)_n]$  ( $n = 2$ ,  $MW_{\text{THEO}} = 365.77$  g/mol).

$^1H$  DOSY NMR spectroscopic study of **11** in  $D_8$ -THF solution

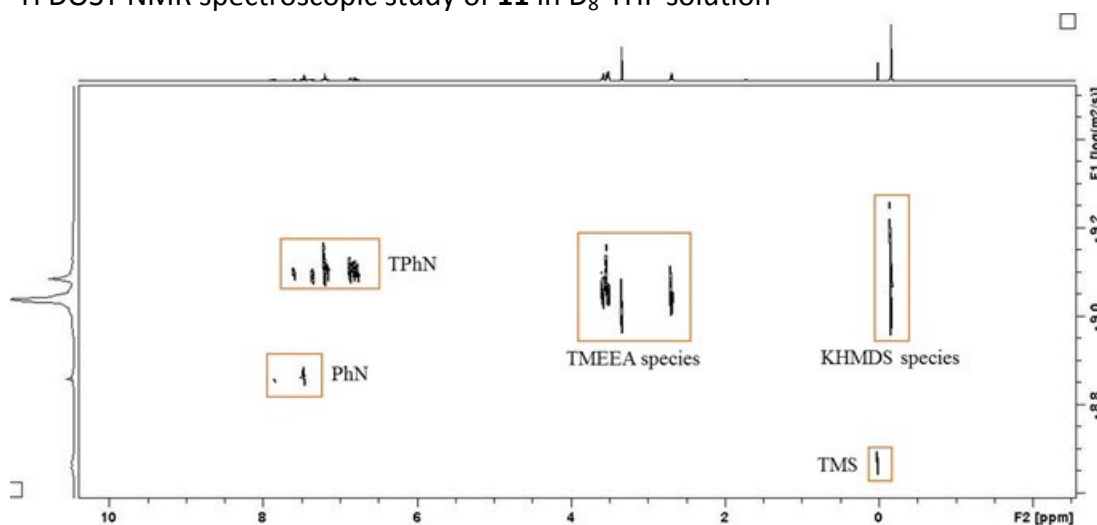

**Figure S39.**  $^1H$  DOSY NMR of **11** in  $D_8$ -THF at 300 K.

**Table S27.** Diffusion coefficients for the internal references (TPhN, PhN and TMS) and for the species present in a solution of **11** in D<sub>8</sub>-THF.

| Internal standards; R <sup>2</sup> = 0.999 |                                    |                                    | Species in solution                |                                    |
|--------------------------------------------|------------------------------------|------------------------------------|------------------------------------|------------------------------------|
| TPhN                                       | PhN                                | TMS                                | KHMDS species                      | TMEEA species                      |
| D / m <sup>2</sup> s <sup>-1</sup>         | D / m <sup>2</sup> s <sup>-1</sup> | D / m <sup>2</sup> s <sup>-1</sup> | D / m <sup>2</sup> s <sup>-1</sup> | D / m <sup>2</sup> s <sup>-1</sup> |
| 8.11 x 10 <sup>-10</sup>                   | 1.38 x 10 <sup>-9</sup>            | 2.14 x 10 <sup>-9</sup>            | 9.08 x 10 <sup>-10</sup>           | 9.07 x 10 <sup>-10</sup>           |

**Table S28.** MW<sub>DOSY</sub> for species found in a solution of **11** in D<sub>8</sub>-THF.

| Species in solution | D (m <sup>2</sup> s <sup>-1</sup> ) | MW <sub>DOSY</sub> (gmol <sup>-1</sup> ) |
|---------------------|-------------------------------------|------------------------------------------|
| KHMDS species       | 9.08 x 10 <sup>-10</sup>            | 375.83                                   |
| TMEEA species       | 9.07 x 10 <sup>-10</sup>            | 376.67                                   |

**Comments on the <sup>1</sup>H DOSY NMR spectrum of **11** in D<sub>8</sub>-THF solution:** When **11** is dissolved in D<sub>8</sub>-THF, <sup>1</sup>H DOSY spectra shows two signals with similar diffusion coefficients (Figure S39). The obtained MW<sub>DOSY</sub> for these diffusion coefficient values are 375.83 g/mol for the HMDS species and 376.37 g/mol for the TMEEA part (323.43 g/mol expected for free ligand). The MW<sub>DOSY</sub> obtained for the HMDS species is the highest with respect to the other studied compounds, this suggesting that the heptadentate ligand is a strong competitor to coordinate the metallic centre. Also, regarding the MW<sub>DOSY</sub> obtained for the TMEEA species, it is higher than that of the free ligand, in contrast to the other studied species, this being in agreement with the strong coordination of the heptadentate ligand to coordinate KHMDS (Table S27 and S28).

## REFERENCES

1. G. M. Sheldrick, *Acta Cryst. A*, 2008, **64**, 112.
